# Supplementary material for: Comparative Analysis of Clinical and Environmental Strains of Exophiala spinifera by Long-Reads Sequencing and RNAseq Reveal Adaptive Strategies
Source: Front Microbiol. 2020 Jul 31;11:1880. doi: 10.3389/fmicb.2020.01880 (PMC7412599; doi:10.3389/fmicb.2020.01880)
Supplement: Supplementary file 4 [file Table_4.XLSX]

## Sheet: ESC1_ESE1_up
Table S5 Differentially expressed genes between clinical isolate and environmental isolates
GeneID	Log2FC	P-value	FDR
ESC1_0100320	6.05405	0.00266631	0.0287545
ESC1_0100440	4.53933	2.8179e-13	2.4159e-11
ESC1_0100570	2.00641	0.00177663	0.0202648
ESC1_0100580	2.96987	2.34744e-08	9.59146e-07
ESC1_0100840	4.63644	9.93889e-05	0.00169604
ESC1_0100850	3.16234	7.04275e-05	0.00124579
ESC1_0100860	4.86752	1.65602e-19	2.62043e-17
ESC1_0101110	2.26267	2.90244e-05	0.000578031
ESC1_0101420	3.52396	3.99644e-05	0.000752835
ESC1_0101520	2.43105	0.000583093	0.00786769
ESC1_0101740	2.4006	0.000432655	0.00614257
ESC1_0102980	2.56247	2.98013e-06	7.56152e-05
ESC1_0103030	3.46176	1.3255e-16	1.72177e-14
ESC1_0103140	2.18474	0.000178338	0.00287955
ESC1_0103640	1.88822	0.00447166	0.0445783
ESC1_0103780	2.46706	2.08277e-09	1.03579e-07
ESC1_0104400	1.99295	0.00332522	0.0345339
ESC1_0104440	1.83893	0.00457978	0.0453962
ESC1_0104540	2.47832	4.89707e-08	1.89419e-06
ESC1_0104690	3.16828	2.15905e-11	1.36161e-09
ESC1_0104830	2.73274	4.01189e-09	1.93975e-07
ESC1_0104860	1.97765	0.0027837	0.02979
ESC1_0105270	2.07209	0.00381734	0.0389476
ESC1_0105650	2.99864	9.49782e-08	3.4422e-06
ESC1_0105770	2.51853	1.72371e-05	0.000363231
ESC1_0105890	2.70325	1.62904e-06	4.33564e-05
ESC1_0106810	4.86715	1.9803e-05	0.000412309
ESC1_0106930	3.27078	1.02055e-14	1.04695e-12
ESC1_0106990	2.58925	4.47072e-06	0.000109294
ESC1_0107100	6.76305	2.5736e-07	8.38876e-06
ESC1_0107550	2.92342	6.25722e-05	0.00112282
ESC1_0107580	3.12189	2.0325e-12	1.5249e-10
ESC1_0107870	2.92737	5.19228e-16	6.45548e-14
ESC1_0107890	2.52245	0.000184503	0.00296807
ESC1_0107930	5.08926	6.66409e-30	2.3199e-27
ESC1_0107980	2.03715	0.000990177	0.0123107
ESC1_0108170	2.64716	1.95114e-08	8.17054e-07
ESC1_0108370	1.95768	0.00479662	0.0469573
ESC1_0108420	2.14579	0.00023433	0.00366794
ESC1_0108440	2.41733	6.09657e-10	3.23527e-08
ESC1_0108650	2.63246	0.000694886	0.00906685
ESC1_0108830	3.67183	3.94168e-21	7.6232e-19
ESC1_0108840	3.27408	4.27741e-09	2.0567e-07
ESC1_0108850	3.22473	1.11002e-07	3.87971e-06
ESC1_0108870	3.7046	3.32557e-13	2.78293e-11
ESC1_0108880	2.57176	3.47924e-05	0.000668429
ESC1_0108890	2.44934	5.03833e-07	1.52783e-05
ESC1_0108930	2.9133	4.48012e-21	8.47619e-19
ESC1_0109000	2.99637	0.000101212	0.00171705
ESC1_0109130	2.17642	0.000330558	0.00490094
ESC1_0109150	5.15666	3.27887e-05	0.000635546
ESC1_0109190	2.58283	0.000444378	0.0062885
ESC1_0109290	2.23484	3.63224e-07	1.13303e-05
ESC1_0109510	2.24733	0.00298781	0.0315953
ESC1_0109570	5.71734	6.42276e-08	2.45163e-06
ESC1_0109690	3.7173	1.75364e-08	7.51821e-07
ESC1_0109710	2.52769	1.63947e-07	5.55187e-06
ESC1_0109760	2.9984	7.45825e-09	3.5086e-07
ESC1_0109980	2.84458	3.71731e-20	6.2215e-18
ESC1_0109990	3.12831	2.79636e-12	2.02806e-10
ESC1_0110510	2.08875	0.0016766	0.0191992
ESC1_0111000	2.06231	0.00325037	0.0339123
ESC1_0111310	4.45244	3.81777e-29	1.18665e-26
ESC1_0111330	2.45039	2.24689e-07	7.46363e-06
ESC1_0111430	3.93522	0.00197396	0.0222242
ESC1_0111580	4.93411	7.78874e-23	1.6773e-20
ESC1_0111990	2.71413	8.24065e-06	0.000188733
ESC1_0112060	2.86411	6.57739e-10	3.40732e-08
ESC1_0112240	3.63134	2.21049e-10	1.20993e-08
ESC1_0112430	3.54113	1.06386e-11	7.17737e-10
ESC1_0112450	3.13192	1.78249e-17	2.46238e-15
ESC1_0112460	2.41922	4.55592e-05	0.00084362
ESC1_0112620	3.60741	0.00311485	0.0327398
ESC1_0112840	3.04527	6.397e-07	1.88085e-05
ESC1_0113730	5.42412	5.63937e-41	3.27197e-38
ESC1_0113740	4.53339	3.51133e-35	1.79759e-32
ESC1_0114000	2.10144	1.85148e-06	4.8977e-05
ESC1_0114220	2.93454	3.06962e-07	9.78568e-06
ESC1_0114240	1.96523	0.00335624	0.0347731
ESC1_0114280	1.85986	0.00279538	0.0298506
ESC1_0114340	1.99602	0.000410808	0.00589005
ESC1_0114410	2.84622	1.73189e-05	0.000364073
ESC1_0114420	4.77389	1.00611e-33	4.43751e-31
ESC1_0114750	4.23887	0.00440829	0.0440475
ESC1_0114840	2.28085	6.05303e-06	0.000143541
ESC1_0114920	2.23112	6.20326e-06	0.000146306
ESC1_0115000	2.56839	0.000843494	0.0107323
ESC1_0115600	2.70514	1.56573e-09	7.87661e-08
ESC1_0115610	2.85833	3.26172e-14	3.11942e-12
ESC1_0115720	1.93525	9.31182e-06	0.000210496
ESC1_0116350	2.98547	1.20332e-06	3.28291e-05
ESC1_0116500	2.69894	0.00325368	0.0339123
ESC1_0116800	2.83086	2.48136e-05	0.000499891
ESC1_0116860	2.3218	4.52905e-05	0.000840433
ESC1_0116980	1.80064	0.00120486	0.0145436
ESC1_0117030	2.33165	0.00225584	0.0247886
ESC1_0117050	2.84274	0.000545723	0.00744425
ESC1_0117080	4.90086	2.48507e-18	3.5455e-16
ESC1_0117100	3.91633	1.60014e-08	6.92881e-07
ESC1_0117120	7.21591	7.57161e-86	3.29479e-82
ESC1_0117150	5.93087	3.76548e-17	5.04168e-15
ESC1_0117200	2.49358	3.45496e-06	8.591e-05
ESC1_0117260	1.87776	7.71767e-05	0.00135145
ESC1_0117340	2.31908	7.18414e-12	5.04223e-10
ESC1_0117750	2.59195	0.000222837	0.00352609
ESC1_0117930	2.40111	0.000629333	0.00833651
ESC1_0118060	5.33372	0.000607562	0.00813478
ESC1_0200700	2.33837	0.000189223	0.0030328
ESC1_0200860	4.14333	3.37803e-22	6.99976e-20
ESC1_0201570	2.79829	2.8036e-05	0.000562206
ESC1_0201970	3.28664	5.45634e-11	3.29768e-09
ESC1_0202010	2.46799	4.98455e-09	2.37052e-07
ESC1_0202040	2.03818	0.00512365	0.0498225
ESC1_0202120	3.98969	9.16503e-16	1.07788e-13
ESC1_0202200	2.27169	1.80093e-05	0.000376766
ESC1_0202320	2.74731	0.000129023	0.00213883
ESC1_0202530	2.70369	8.65091e-16	1.03135e-13
ESC1_0202710	2.52565	4.2416e-05	0.000793864
ESC1_0202750	2.80393	5.08896e-07	1.5325e-05
ESC1_0203000	2.89146	4.19358e-06	0.000103684
ESC1_0203330	1.88035	0.000179576	0.00289417
ESC1_0204140	2.6522	7.44836e-06	0.000172402
ESC1_0204280	2.10542	0.000228466	0.00360206
ESC1_0204470	2.08051	2.01417e-05	0.000417364
ESC1_0204610	2.1576	0.000269327	0.00409781
ESC1_0205020	2.38857	6.55957e-07	1.92215e-05
ESC1_0205040	2.74612	7.24513e-11	4.26043e-09
ESC1_0205060	1.69154	0.00119813	0.0145025
ESC1_0205220	4.30781	3.80342e-09	1.85962e-07
ESC1_0205390	2.10078	0.00063767	0.0084213
ESC1_0205510	4.49235	0.000727834	0.0094261
ESC1_0205560	4.46198	0.000253711	0.00392891
ESC1_0205670	1.86945	0.00309949	0.0326572
ESC1_0205900	3.76689	3.02483e-14	2.92501e-12
ESC1_0206000	1.94709	0.000777878	0.0100146
ESC1_0206210	2.90891	4.27099e-07	1.3181e-05
ESC1_0206230	2.9117	1.32981e-11	8.83461e-10
ESC1_0206240	2.88615	2.92158e-06	7.43464e-05
ESC1_0206540	1.94493	0.000846967	0.0107608
ESC1_0206760	1.87819	0.00170397	0.0194871
ESC1_0206950	2.10012	0.00246643	0.0267982
ESC1_0207250	2.27786	0.000339523	0.00500825
ESC1_0207350	2.18804	4.64744e-08	1.81375e-06
ESC1_0207430	3.68339	2.70051e-20	4.60835e-18
ESC1_0207480	2.04036	0.00272738	0.029232
ESC1_0207530	2.09378	0.00375008	0.0383964
ESC1_0207820	2.33628	7.19891e-07	2.08147e-05
ESC1_0208210	2.27836	7.85996e-05	0.00137085
ESC1_0208420	4.56503	3.15123e-24	7.41221e-22
ESC1_0208550	2.14971	0.000324251	0.00482386
ESC1_0208770	2.29484	0.000254256	0.00393035
ESC1_0208780	2.5584	0.000473185	0.00661016
ESC1_0209080	1.81203	3.96819e-05	0.000750765
ESC1_0209220	4.8843	3.61554e-16	4.5603e-14
ESC1_0209520	2.26429	0.000185953	0.00298589
ESC1_0209880	2.48783	0.000605042	0.00811352
ESC1_0209950	2.21494	0.000101959	0.00172636
ESC1_0209990	2.7037	3.36139e-17	4.57096e-15
ESC1_0210960	2.78427	4.20954e-06	0.000103784
ESC1_0211640	2.74743	2.83146e-13	2.4159e-11
ESC1_0211690	3.27788	1.7874e-08	7.62536e-07
ESC1_0211720	4.50956	3.49498e-19	5.43157e-17
ESC1_0211960	2.25386	0.000721728	0.00936095
ESC1_0212000	3.46252	1.97466e-21	3.90578e-19
ESC1_0212080	3.59323	2.08745e-06	5.46439e-05
ESC1_0212150	2.55354	2.89827e-05	0.000578031
ESC1_0213280	3.1427	4.62937e-12	3.27556e-10
ESC1_0213290	2.81075	5.6367e-06	0.00013477
ESC1_0213370	3.16622	8.58932e-05	0.00148614
ESC1_0213450	3.05384	4.34303e-10	2.31886e-08
ESC1_0213530	2.37854	0.000415799	0.0059323
ESC1_0213620	3.12294	3.60814e-07	1.12956e-05
ESC1_0213640	2.15216	0.00478847	0.0469573
ESC1_0213710	4.42965	2.79843e-07	9.02028e-06
ESC1_0213940	1.73949	0.000622176	0.00829219
ESC1_0213950	3.56797	4.56437e-11	2.81729e-09
ESC1_0214000	3.67269	1.00842e-07	3.61164e-06
ESC1_0214120	3.45975	9.532e-08	3.4422e-06
ESC1_0214130	3.8695	7.62666e-08	2.87337e-06
ESC1_0214150	4.08207	2.2575e-15	2.51885e-13
ESC1_0214170	6.95335	1.64792e-60	2.86838e-57
ESC1_0214180	4.07541	1.18617e-46	1.14702e-43
ESC1_0214190	4.81975	9.52251e-26	2.51135e-23
ESC1_0214210	3.99185	6.13491e-07	1.81606e-05
ESC1_0214490	2.36108	1.77781e-05	0.000372826
ESC1_0214810	2.79683	3.76685e-10	2.02364e-08
ESC1_0215060	3.09413	1.6626e-05	0.000351204
ESC1_0215990	3.97685	0.00155579	0.0181674
ESC1_0216010	3.8139	7.93769e-16	9.59469e-14
ESC1_0216030	2.5804	8.06427e-07	2.29357e-05
ESC1_0216220	6.11764	6.33218e-13	5.05587e-11
ESC1_0216230	3.22234	7.91034e-09	3.70127e-07
ESC1_0216470	2.35328	0.000558566	0.00759563
ESC1_0216640	2.91105	6.72461e-08	2.54453e-06
ESC1_0216920	3.37851	7.23721e-07	2.08561e-05
ESC1_0217040	1.85755	0.00121357	0.0146284
ESC1_0217230	3.80067	1.16783e-12	9.07467e-11
ESC1_0217270	4.511	1.6944e-09	8.47491e-08
ESC1_0217310	2.50292	0.000383424	0.00555232
ESC1_0217320	1.94976	0.00185705	0.0210577
ESC1_0217370	2.44151	6.7303e-05	0.00119538
ESC1_0217460	2.58781	2.8342e-08	1.14726e-06
ESC1_0217590	2.41439	0.000516241	0.0070977
ESC1_0218040	4.35564	5.60857e-05	0.00101268
ESC1_0218140	2.1248	0.000410186	0.00589005
ESC1_0218180	3.00241	3.51602e-05	0.000672526
ESC1_0218230	2.0838	0.00443348	0.0442484
ESC1_0218840	3.4469	2.67239e-07	8.64602e-06
ESC1_0218890	2.88614	4.49953e-12	3.20979e-10
ESC1_0219160	3.23251	0.000136031	0.00223796
ESC1_0219190	2.77091	4.29246e-08	1.69692e-06
ESC1_0219210	6.75376	1.72928e-08	7.45046e-07
ESC1_0219290	2.44889	9.64064e-05	0.00165488
ESC1_0219350	6.06475	4.94045e-76	1.43323e-72
ESC1_0219460	4.00299	5.32617e-11	3.24151e-09
ESC1_0219520	1.83665	0.000257192	0.00396167
ESC1_0219620	3.01131	1.0284e-11	7.02965e-10
ESC1_0219900	1.92918	0.000591291	0.00794136
ESC1_0220100	2.20101	0.000289142	0.00434611
ESC1_0300720	3.37068	0.00087812	0.0111241
ESC1_0301200	1.74074	0.000839808	0.0107011
ESC1_0301660	3.15666	2.24337e-13	1.9524e-11
ESC1_0301760	2.31343	1.19396e-06	3.26763e-05
ESC1_0301840	3.04853	9.21884e-06	0.000208936
ESC1_0302110	1.86541	0.00234723	0.0256633
ESC1_0302280	2.65116	0.00225015	0.0247573
ESC1_0302400	2.05363	0.00132881	0.0157772
ESC1_0302550	2.39363	4.22834e-06	0.00010389
ESC1_0302780	1.80794	0.00479489	0.0469573
ESC1_0302800	4.08319	7.54831e-11	4.40892e-09
ESC1_0302850	1.75251	0.000571903	0.00774071
ESC1_0302940	3.28368	6.04131e-13	4.86829e-11
ESC1_0303000	1.80427	0.000802464	0.0102855
ESC1_0303230	2.22419	0.00161666	0.0186603
ESC1_0303250	1.69413	0.0042505	0.0426668
ESC1_0303420	2.09101	1.99968e-05	0.00041535
ESC1_0303440	3.57033	2.15977e-09	1.06798e-07
ESC1_0303630	2.98008	0.000101029	0.00171705
ESC1_0304060	4.09857	1.31043e-11	8.77282e-10
ESC1_0304500	2.415	0.00278629	0.02979
ESC1_0304730	1.91065	0.00327509	0.0340947
ESC1_0304800	2.15514	0.00216491	0.0239405
ESC1_0304880	2.64607	0.00104816	0.0129026
ESC1_0305170	1.86284	0.00229203	0.0250913
ESC1_0305240	4.07492	6.56915e-21	1.21641e-18
ESC1_0305460	2.71309	1.61886e-05	0.000342797
ESC1_0305510	2.01141	0.000377418	0.00547445
ESC1_0305570	3.16819	1.42151e-13	1.28869e-11
ESC1_0305580	2.54837	0.000255335	0.00394003
ESC1_0305600	2.88815	8.04866e-06	0.000185311
ESC1_0305820	2.23281	9.59184e-09	4.41681e-07
ESC1_0306220	2.01418	0.00143295	0.0169443
ESC1_0306280	3.44723	1.47684e-06	3.96696e-05
ESC1_0306350	2.14281	4.62566e-06	0.000112765
ESC1_0306440	2.10452	3.20494e-05	0.0006268
ESC1_0306790	2.0005	0.00474816	0.0467987
ESC1_0307310	2.03021	0.000624679	0.00831281
ESC1_0307560	1.87004	0.000412072	0.00589846
ESC1_0307850	1.678	0.00183521	0.0208509
ESC1_0307860	2.01045	1.52207e-05	0.000325468
ESC1_0307990	2.22805	5.2178e-07	1.56588e-05
ESC1_0308130	2.29128	0.000162923	0.00264538
ESC1_0308540	3.92443	2.50995e-20	4.36882e-18
ESC1_0308730	1.83816	0.000331646	0.0049087
ESC1_0309140	7.23461	8.8542e-05	0.00152893
ESC1_0309230	6.7741	0.000976552	0.0122111
ESC1_0309510	2.22954	1.95274e-08	8.17054e-07
ESC1_0310110	2.4114	1.1616e-05	0.000256583
ESC1_0310350	2.05687	0.00104762	0.0129026
ESC1_0310800	2.73461	0.000537765	0.00735875
ESC1_0311210	1.94694	0.000263914	0.00404374
ESC1_0311250	3.48005	8.76464e-08	3.27208e-06
ESC1_0311350	3.10397	6.63332e-08	2.52095e-06
ESC1_0311510	2.06344	0.00159587	0.0184447
ESC1_0311660	2.42442	0.000685944	0.0089771
ESC1_0311970	2.1039	0.0043919	0.0439342
ESC1_0312070	2.51744	1.08718e-05	0.000242609
ESC1_0312660	1.85063	0.000997787	0.0123876
ESC1_0312740	1.7432	0.000428832	0.00609824
ESC1_0400590	3.08115	2.50944e-06	6.42342e-05
ESC1_0400600	1.80988	0.00162279	0.0187061
ESC1_0400760	5.80332	0.00374402	0.0383795
ESC1_0401100	5.04871	3.92215e-34	1.89636e-31
ESC1_0401180	2.33989	3.85749e-05	0.00073141
ESC1_0401460	2.8385	1.39195e-05	0.000301346
ESC1_0401650	2.0225	0.00259634	0.0281044
ESC1_0401880	3.85671	1.56223e-12	1.19264e-10
ESC1_0401950	3.56522	7.31306e-13	5.73384e-11
ESC1_0401970	5.1952	1.19395e-55	1.73182e-52
ESC1_0402390	2.0693	0.000713141	0.00926338
ESC1_0402480	2.54881	0.000311881	0.00466375
ESC1_0402820	2.71623	1.34251e-11	8.85143e-10
ESC1_0403150	2.83582	5.48486e-06	0.000131501
ESC1_0404000	3.59245	2.14217e-11	1.36083e-09
ESC1_0404390	2.88917	0.000296096	0.00444297
ESC1_0404440	2.98468	1.81945e-08	7.72424e-07
ESC1_0404490	5.79793	8.00384e-20	1.31429e-17
ESC1_0404600	2.76721	2.02793e-06	5.34821e-05
ESC1_0404610	2.109	0.0030679	0.0323636
ESC1_0404800	3.04656	9.96738e-16	1.15661e-13
ESC1_0404810	2.83591	2.89243e-08	1.16541e-06
ESC1_0404870	1.81776	0.000398861	0.00574716
ESC1_0404980	2.01282	0.000856662	0.0108681
ESC1_0405230	4.86731	0.00465641	0.0459986
ESC1_0405240	2.40854	7.76678e-16	9.52032e-14
ESC1_0405250	4.36364	6.49875e-11	3.87388e-09
ESC1_0405340	2.42786	4.15505e-05	0.000779341
ESC1_0405470	3.38858	8.48721e-19	1.27352e-16
ESC1_0405500	3.15724	2.18889e-10	1.20569e-08
ESC1_0405760	1.8807	0.00050916	0.00702254
ESC1_0405850	1.68788	0.00069644	0.00907353
ESC1_0406120	1.88544	0.00397796	0.0403969
ESC1_0406410	3.06265	1.81989e-05	0.000379821
ESC1_0406750	2.63219	0.000101127	0.00171705
ESC1_0406930	2.23172	0.000175661	0.0028416
ESC1_0406950	2.73612	3.44254e-05	0.00066284
ESC1_0406980	3.8071	9.05963e-09	4.19393e-07
ESC1_0407520	1.77482	0.00157437	0.0182649
ESC1_0407890	3.41111	9.08587e-05	0.00156583
ESC1_0408170	4.35336	9.53876e-20	1.53733e-17
ESC1_0408370	5.85867	0.000482475	0.00672914
ESC1_0408440	2.92723	6.59295e-06	0.000154659
ESC1_0408610	3.25378	1.6682e-10	9.48909e-09
ESC1_0408720	3.47567	0.000105495	0.0017793
ESC1_0409310	1.66625	0.000820085	0.0104805
ESC1_0409420	2.71542	2.41303e-06	6.19486e-05
ESC1_0409440	3.3223	9.07852e-08	3.36214e-06
ESC1_0409640	1.84446	0.00206489	0.0230395
ESC1_0409770	2.81123	1.72302e-12	1.30395e-10
ESC1_0409880	3.38764	0.00292015	0.0310306
ESC1_0410110	2.80185	2.54052e-07	8.31209e-06
ESC1_0410370	2.48319	0.00209377	0.0232722
ESC1_0410800	2.46536	2.61226e-07	8.48301e-06
ESC1_0410990	2.01932	0.000270096	0.00410235
ESC1_0411230	2.31715	0.000424915	0.00605243
ESC1_0411250	3.45863	2.55029e-11	1.59678e-09
ESC1_0411260	2.45829	9.63835e-08	3.46622e-06
ESC1_0411330	4.81517	1.89613e-10	1.05782e-08
ESC1_0411430	2.57789	0.000202126	0.00323365
ESC1_0411730	2.03688	0.000589115	0.00792437
ESC1_0411770	1.95244	7.95398e-05	0.00138447
ESC1_0412040	2.05539	1.64611e-07	5.55275e-06
ESC1_0412220	5.30803	7.24855e-06	0.000168674
ESC1_0412510	2.68719	0.00051357	0.00707215
ESC1_0412650	3.41305	1.46962e-07	4.99613e-06
ESC1_0413060	3.03758	1.021e-08	4.67671e-07
ESC1_0413180	2.16403	0.000563691	0.00765336
ESC1_0413360	2.70776	9.17024e-08	3.38172e-06
ESC1_0413540	2.84549	1.00311e-06	2.78029e-05
ESC1_0413590	2.49999	1.11059e-05	0.000246567
ESC1_0413800	2.83432	0.00032009	0.00477829
ESC1_0413920	2.62961	6.69057e-05	0.00119076
ESC1_0414020	1.70405	0.00426291	0.042742
ESC1_0414040	3.21406	8.23288e-09	3.83159e-07
ESC1_0414110	2.36624	0.000120736	0.00201296
ESC1_0414200	1.91916	0.00113278	0.013827
ESC1_0414430	2.2542	0.00238082	0.0259653
ESC1_0414580	5.52896	2.1837e-08	8.99604e-07
ESC1_0414700	1.71875	0.00155128	0.0181463
ESC1_0414790	3.12567	6.09075e-06	0.000144043
ESC1_0414860	6.01156	6.55601e-23	1.463e-20
ESC1_0414900	2.98744	6.88213e-07	2.0099e-05
ESC1_0500160	4.47658	0.00129793	0.0154527
ESC1_0500920	2.72452	1.60024e-08	6.92881e-07
ESC1_0500930	2.29016	9.36426e-06	0.000211133
ESC1_0500990	2.6441	0.000909689	0.0114739
ESC1_0501170	3.25726	3.42037e-06	8.52935e-05
ESC1_0501700	2.50637	3.17023e-06	7.97414e-05
ESC1_0502630	2.91876	4.6831e-05	0.000864712
ESC1_0502800	2.83081	2.31509e-07	7.63191e-06
ESC1_0502810	7.45881	0.0010868	0.013303
ESC1_0503100	1.88701	0.00268617	0.0289328
ESC1_0503190	3.39332	1.42078e-10	8.13492e-09
ESC1_0503400	5.6319	1.85067e-20	3.3555e-18
ESC1_0503450	3.3293	0.00113517	0.0138366
ESC1_0503500	3.02366	5.44499e-05	0.000991376
ESC1_0503630	4.30125	0.000275825	0.00417479
ESC1_0503830	2.38837	0.000611623	0.00817658
ESC1_0503960	2.61295	7.55024e-05	0.00132479
ESC1_0503970	2.51151	5.32043e-07	1.58574e-05
ESC1_0504000	1.59511	0.00249848	0.0271126
ESC1_0504020	2.26287	3.08626e-05	0.000607687
ESC1_0504160	2.3732	5.58907e-05	0.00101126
ESC1_0504190	3.64592	1.6532e-29	5.32881e-27
ESC1_0504220	2.29497	1.19697e-07	4.15027e-06
ESC1_0504290	2.75791	9.85283e-06	0.000221574
ESC1_0504550	3.22963	1.05489e-08	4.78164e-07
ESC1_0504580	3.69022	7.90179e-23	1.6773e-20
ESC1_0505100	2.75912	3.12685e-06	7.88782e-05
ESC1_0505270	2.00097	0.000627383	0.00832742
ESC1_0505330	2.24348	5.51006e-05	0.00100113
ESC1_0505340	2.08635	4.68969e-05	0.000864712
ESC1_0505680	1.63386	4.06825e-05	0.000764708
ESC1_0505770	3.14842	0.000979998	0.0122366
ESC1_0505950	2.01469	7.34051e-06	0.000170358
ESC1_0505990	2.11182	9.4107e-08	3.42908e-06
ESC1_0506130	1.77204	9.88627e-05	0.00169038
ESC1_0506150	4.90046	3.8608e-65	8.40015e-62
ESC1_0506260	2.16175	1.11868e-06	3.08098e-05
ESC1_0506450	2.33667	3.26728e-05	0.000635546
ESC1_0506530	3.81556	1.84975e-08	7.81473e-07
ESC1_0507410	3.25882	0.00147726	0.0173972
ESC1_0507570	3.57853	7.22543e-05	0.00127036
ESC1_0508310	3.7991	1.43261e-05	0.000308615
ESC1_0508840	2.7941	9.41688e-08	3.42908e-06
ESC1_0508950	2.57548	1.26716e-06	3.44629e-05
ESC1_0509080	1.83161	0.000496294	0.00685595
ESC1_0509190	3.08011	1.14973e-05	0.000254607
ESC1_0509400	2.06108	0.00191633	0.0216034
ESC1_0509500	2.77293	9.52672e-07	2.65741e-05
ESC1_0509920	2.11292	0.000769381	0.00991988
ESC1_0510030	2.11282	0.000733112	0.00948035
ESC1_0510550	3.44475	1.15738e-18	1.70723e-16
ESC1_0510660	4.98228	4.44082e-46	3.86485e-43
ESC1_0510780	1.88002	0.00297506	0.0314987
ESC1_0510830	2.19684	0.00157612	0.0182649
ESC1_0510860	4.16779	2.31562e-30	8.39703e-28
ESC1_0511020	2.61853	0.000159121	0.00259332
ESC1_0511100	2.57696	8.07214e-05	0.00139944
ESC1_0511230	2.18818	0.000272154	0.0041264
ESC1_0511480	2.18831	7.28261e-07	2.09177e-05
ESC1_0511490	1.86265	0.000467667	0.00655412
ESC1_0511590	2.74556	4.73869e-05	0.000871899
ESC1_0511760	2.47613	0.000492947	0.00684599
ESC1_0512530	3.48032	4.62227e-09	2.21031e-07
ESC1_0512730	2.38503	0.00222641	0.0245271
ESC1_0512810	1.92774	0.00107355	0.0131593
ESC1_0513120	2.24299	0.000682874	0.00895038
ESC1_0513130	3.08257	5.07467e-05	0.000929787
ESC1_0513180	2.65093	2.30771e-05	0.000468642
ESC1_0513200	2.27193	0.00211877	0.02352
ESC1_0513230	2.20323	0.000282413	0.00425968
ESC1_0513250	5.92266	3.15135e-07	1.00096e-05
ESC1_0513260	2.01859	0.00281667	0.030041
ESC1_0513300	2.28119	4.42705e-05	0.00082326
ESC1_0513580	2.74269	2.52849e-06	6.45321e-05
ESC1_0513890	3.31297	1.22747e-16	1.61859e-14
ESC1_0600590	3.01481	2.93107e-07	9.37836e-06
ESC1_0600670	1.85526	3.10711e-05	0.000610411
ESC1_0600760	2.28812	3.42359e-05	0.000662122
ESC1_0600800	1.84262	0.00433075	0.0433723
ESC1_0600810	2.12528	0.00106614	0.0131054
ESC1_0601150	2.23425	0.00191493	0.0216034
ESC1_0601500	2.62939	3.63544e-13	2.98483e-11
ESC1_0602180	1.82307	3.66585e-05	0.000698116
ESC1_0602550	2.78144	1.05623e-07	3.73673e-06
ESC1_0602660	3.99407	1.01977e-33	4.43751e-31
ESC1_0602810	3.44947	9.87324e-05	0.00169038
ESC1_0603010	2.21811	4.23772e-06	0.00010389
ESC1_0603380	1.95678	0.00303275	0.0320316
ESC1_0603460	2.78128	2.26922e-05	0.000462507
ESC1_0603550	2.35684	8.26883e-06	0.000188881
ESC1_0603640	2.72874	3.0247e-05	0.000596915
ESC1_0603930	3.60769	4.46911e-25	1.11128e-22
ESC1_0603960	2.32239	3.20886e-06	8.04805e-05
ESC1_0604110	3.06564	5.3982e-05	0.000984916
ESC1_0604180	3.57291	1.69543e-15	1.91628e-13
ESC1_0604350	1.80167	0.000934563	0.0117367
ESC1_0604690	2.12627	0.000111424	0.00186484
ESC1_0604710	4.59528	4.8269e-25	1.1669e-22
ESC1_0604740	1.80624	0.00163927	0.0188462
ESC1_0605030	2.20151	2.07242e-06	5.44903e-05
ESC1_0605110	4.04942	6.09747e-28	1.76888e-25
ESC1_0605240	1.74839	0.00485512	0.0474174
ESC1_0605250	1.72778	0.000988151	0.0123031
ESC1_0605410	2.25849	0.000539363	0.00736903
ESC1_0605520	2.45439	7.19975e-05	0.00126841
ESC1_0605650	2.70163	0.000701949	0.00913163
ESC1_0605740	3.55003	3.20276e-07	1.01359e-05
ESC1_0605910	3.03706	1.79914e-06	4.77375e-05
ESC1_0605960	3.06596	7.82292e-05	0.00136713
ESC1_0606310	3.16951	0.000329426	0.00489248
ESC1_0606700	1.66295	0.0045324	0.045029
ESC1_0607200	2.94287	1.61862e-06	4.32113e-05
ESC1_0607450	2.36746	5.75757e-09	2.72327e-07
ESC1_0607640	3.42593	1.0738e-27	3.01459e-25
ESC1_0608510	2.6159	3.35901e-06	8.40043e-05
ESC1_0608740	6.13955	8.31631e-15	8.93541e-13
ESC1_0608910	2.28874	5.43235e-06	0.000130601
ESC1_0609020	2.46115	0.000209147	0.00333982
ESC1_0609110	3.28802	1.30417e-05	0.000284917
ESC1_0609150	2.29405	0.00126497	0.0151223
ESC1_0609230	3.2072	0.00406221	0.0411086
ESC1_0609410	2.33541	1.44669e-08	6.39112e-07
ESC1_0609580	6.1524	2.10053e-06	5.47333e-05
ESC1_0609610	2.26323	1.29593e-06	3.50263e-05
ESC1_0609660	1.82822	0.000364649	0.00532474
ESC1_0609740	3.07011	8.72392e-11	5.06162e-09
ESC1_0609820	2.07185	0.00182101	0.0207167
ESC1_0610640	2.93288	2.52201e-10	1.37181e-08
ESC1_0610820	1.99642	0.00167071	0.0191571
ESC1_0611580	2.28174	2.95025e-05	0.000586211
ESC1_0611620	2.05424	0.000460363	0.00647259
ESC1_0611650	1.9514	0.0002334	0.00365997
ESC1_0611760	2.78729	2.48924e-08	1.01233e-06
ESC1_0611940	3.09042	2.15973e-08	8.95053e-07
ESC1_0611950	1.86095	0.00124937	0.0149909
ESC1_0612070	1.92943	0.00257619	0.027921
ESC1_0612120	2.39449	2.29344e-06	5.90527e-05
ESC1_0612260	1.75002	4.97402e-05	0.000913268
ESC1_0612360	2.45601	0.00135229	0.0160341
ESC1_0613240	1.67493	0.00212571	0.023567
ESC1_0613270	2.85155	2.39461e-05	0.000483533
ESC1_0613290	2.18215	0.000129831	0.00214405
ESC1_0613430	2.2104	0.0031504	0.0330337
ESC1_0700450	3.42868	0.000942262	0.0117993
ESC1_0700470	2.0237	0.00149538	0.0175394
ESC1_0700480	2.60514	0.000283943	0.00427535
ESC1_0700540	2.30975	6.49431e-05	0.00116057
ESC1_0700550	2.03039	2.50706e-07	8.23358e-06
ESC1_0700570	2.08662	1.08151e-07	3.81069e-06
ESC1_0700860	3.54524	2.52973e-09	1.24385e-07
ESC1_0701410	2.2611	2.07281e-05	0.00042748
ESC1_0701470	1.73563	0.00363128	0.0374
ESC1_0701620	2.88305	1.43975e-05	0.000309386
ESC1_0702320	1.75128	0.00416509	0.0420519
ESC1_0702460	2.09432	6.01133e-05	0.00108316
ESC1_0702480	2.51395	1.14015e-06	3.1302e-05
ESC1_0702940	1.8754	0.00079459	0.0101996
ESC1_0703000	2.59702	3.01998e-05	0.000596915
ESC1_0703490	3.5658	2.38846e-05	0.000483413
ESC1_0703790	1.95195	0.00178643	0.0203499
ESC1_0704450	2.24206	0.00237638	0.0259494
ESC1_0704460	3.77025	1.55862e-05	0.000330846
ESC1_0705000	1.79531	0.000110014	0.00184481
ESC1_0705120	4.47478	1.66056e-45	1.3138e-42
ESC1_0705160	2.22665	1.03808e-05	0.000232247
ESC1_0705210	4.27309	1.12082e-25	2.86896e-23
ESC1_0705330	2.61097	0.000239447	0.0037413
ESC1_0706050	3.38156	6.19492e-10	3.24786e-08
ESC1_0706250	3.29349	9.36622e-08	3.42908e-06
ESC1_0706270	3.25708	0.00485997	0.0474174
ESC1_0706290	1.61808	0.00157	0.0182628
ESC1_0706730	2.91408	4.64419e-11	2.84637e-09
ESC1_0706980	2.52569	2.25051e-05	0.00045977
ESC1_0707030	2.21436	0.00218468	0.0241286
ESC1_0707110	3.35797	0.000223353	0.00352785
ESC1_0707780	4.0213	4.93224e-06	0.000119237
ESC1_0707860	2.33831	0.00129165	0.0153989
ESC1_0707970	1.68919	0.00372581	0.038283
ESC1_0708130	2.47945	3.61152e-05	0.000689278
ESC1_0708340	2.80641	0.000808933	0.0103532
ESC1_0708790	1.85125	0.00163115	0.0187776
ESC1_0708860	2.17799	0.000898535	0.0113497
ESC1_0708890	4.1096	1.16093e-15	1.32941e-13
ESC1_0708930	2.18484	0.000493941	0.00684599
ESC1_0709000	1.92221	2.12195e-05	0.000435549
ESC1_0709020	2.47139	1.29963e-10	7.49053e-09
ESC1_0709080	1.83357	0.00189957	0.02147
ESC1_0709190	2.81021	2.36098e-12	1.74132e-10
ESC1_0709340	2.10908	0.000651346	0.0085759
ESC1_0709970	3.68664	1.7154e-10	9.63169e-09
ESC1_0710010	1.64032	0.00201351	0.0225819
ESC1_0710550	2.94638	2.59567e-15	2.8595e-13
ESC1_0710560	2.59638	7.4371e-07	2.12911e-05
ESC1_0710830	4.02989	5.27201e-13	4.28806e-11
ESC1_0710950	2.96156	1.6263e-11	1.05625e-09
ESC1_0711180	2.26986	5.7984e-06	0.000138256
ESC1_0711200	2.13759	9.79099e-07	2.7224e-05
ESC1_0711210	2.41139	1.02282e-07	3.6482e-06
ESC1_0711380	5.43762	3.85209e-47	4.19059e-44
ESC1_0711390	3.15505	0.00239947	0.0261359
ESC1_0711930	2.35022	0.00146518	0.0173018
ESC1_0711940	1.93087	2.05613e-05	0.000425048
ESC1_0711950	3.741	2.88411e-05	0.000577021
ESC1_0712210	1.79161	0.00205703	0.0229812
ESC1_0712480	4.53995	6.78129e-31	2.56598e-28
ESC1_0712560	2.12908	0.000109116	0.00183327
ESC1_0712690	12.8055	2.05371e-100	1.78734e-96
ESC1_0712940	2.2557	3.74025e-05	0.000710728
ESC1_0713250	1.77661	0.00149416	0.0175394
ESC1_0713460	2.86072	0.000219673	0.00348236
ESC1_0713750	2.18028	4.30607e-07	1.32423e-05
ESC1_0714140	2.29415	0.000359429	0.00526618
ESC1_0714300	2.25102	0.00057705	0.00779824
ESC1_0714570	5.80016	0.000241827	0.00376498
ESC1_0800110	1.61063	0.00228957	0.0250913
ESC1_0801430	1.89204	2.75062e-05	0.000552856
ESC1_0801770	2.35008	1.77995e-07	5.95804e-06
ESC1_0801820	2.4939	1.18063e-07	4.11002e-06
ESC1_0801840	3.13516	3.81624e-07	1.18195e-05
ESC1_0802620	3.22208	5.58362e-08	2.15019e-06
ESC1_0802770	1.80818	0.0010167	0.0125865
ESC1_0802920	2.98903	1.02253e-14	1.04695e-12
ESC1_0803380	3.68747	7.33712e-19	1.12026e-16
ESC1_0803770	2.53924	6.99092e-06	0.000163115
ESC1_0804020	2.32628	1.33952e-05	0.000291445
ESC1_0804030	3.29362	3.48321e-07	1.09438e-05
ESC1_0804110	2.12377	3.25924e-05	0.000635546
ESC1_0804260	3.17637	4.8916e-06	0.000118584
ESC1_0804470	2.01581	0.00012482	0.0020731
ESC1_0804840	4.15137	3.64872e-11	2.2682e-09
ESC1_0805010	3.56153	1.17194e-29	3.92285e-27
ESC1_0805020	1.99905	0.00383631	0.0390813
ESC1_0805070	3.06694	9.44106e-10	4.805e-08
ESC1_0805140	3.51317	3.95038e-08	1.56987e-06
ESC1_0805150	2.44894	6.76613e-05	0.0011993
ESC1_0805240	3.05655	1.14669e-23	2.62622e-21
ESC1_0805680	2.97899	1.46127e-14	1.47877e-12
ESC1_0805810	1.62529	0.00061523	0.00821219
ESC1_0805870	2.88808	1.35413e-07	4.67659e-06
ESC1_0806020	2.10329	0.00159516	0.0184447
ESC1_0806110	3.17478	2.12904e-06	5.51461e-05
ESC1_0806180	2.05564	3.27691e-05	0.000635546
ESC1_0806790	2.13402	0.000549981	0.00749059
ESC1_0806800	5.11018	3.51398e-13	2.91258e-11
ESC1_0807060	3.91109	8.47506e-07	2.39475e-05
ESC1_0807770	2.06686	0.00270638	0.0290787
ESC1_0807870	4.54675	1.89671e-18	2.75118e-16
ESC1_0807900	3.55569	4.40431e-08	1.72661e-06
ESC1_0807910	2.1526	0.0011578	0.0140535
ESC1_0807920	3.23556	8.59806e-06	0.000195887
ESC1_0807930	6.88289	1.32401e-32	5.23767e-30
ESC1_0807940	4.47654	3.36779e-12	2.4223e-10
ESC1_0807950	5.60548	2.63187e-42	1.76193e-39
ESC1_0807960	3.54293	8.7487e-08	3.27208e-06
ESC1_0807980	4.10348	2.63208e-14	2.60307e-12
ESC1_0808240	2.02845	0.00264253	0.0285334
ESC1_0808390	2.26533	0.000664935	0.00874158
ESC1_0808400	1.92822	0.00402592	0.0407888
ESC1_0808440	5.12543	1.50516e-11	9.84919e-10
ESC1_0808730	5.15566	2.23618e-05	0.000457916
ESC1_0808900	2.93883	6.65435e-11	3.93965e-09
ESC1_0809040	2.13411	0.00026922	0.00409781
ESC1_0809090	2.16211	0.000834284	0.0106463
ESC1_0809520	5.62987	3.69884e-07	1.14968e-05
ESC1_0809660	2.83779	3.09877e-06	7.83972e-05
ESC1_0809670	3.94674	1.03473e-08	4.71481e-07
ESC1_0809680	3.77909	2.75376e-10	1.48857e-08
ESC1_0809690	3.57294	5.23894e-06	0.000126301
ESC1_0809700	3.59876	1.28601e-06	3.48664e-05
ESC1_0810030	1.98216	1.47535e-08	6.48485e-07
ESC1_0810220	2.4986	2.12775e-06	5.51461e-05
ESC1_0810270	4.26941	5.26953e-05	0.00096346
ESC1_0810310	3.04495	6.32077e-08	2.42333e-06
ESC1_0810360	3.63277	0.00297411	0.0314987
ESC1_0810440	2.01388	1.54053e-05	0.000327804

## Sheet: ESC1_ESE2_up
GeneID	Log2FC	P-value	FDR
ESC1_0100570	2.46271	7.3508e-06	0.000128746
ESC1_0100580	3.18495	7.66578e-10	2.76548e-08
ESC1_0100720	2.19266	0.000200695	0.00248264
ESC1_0100860	4.34374	5.68498e-15	4.43772e-13
ESC1_0101110	2.17251	0.000109213	0.00144579
ESC1_0101260	2.25856	9.64152e-05	0.00128957
ESC1_0101360	1.66664	0.00083665	0.00858942
ESC1_0101480	1.94921	0.000754871	0.00785673
ESC1_0101520	2.94668	3.74233e-06	7.07449e-05
ESC1_0101740	2.90467	1.72827e-06	3.48542e-05
ESC1_0102790	2.01264	3.77186e-06	7.11546e-05
ESC1_0103030	3.27959	1.9671e-14	1.48434e-12
ESC1_0103140	2.49311	4.83635e-06	8.90105e-05
ESC1_0103230	1.85545	0.00192671	0.0175164
ESC1_0103420	3.78283	2.23997e-13	1.53658e-11
ESC1_0103590	2.9337	0.00124821	0.0122058
ESC1_0103640	1.88792	0.00517943	0.0407824
ESC1_0103900	3.05171	6.1891e-05	0.000878407
ESC1_0104110	1.8082	7.00329e-06	0.000123616
ESC1_0104120	1.97365	0.000515228	0.00560071
ESC1_0104200	2.53469	0.001162	0.0114743
ESC1_0104540	2.6131	2.82942e-09	9.41927e-08
ESC1_0104690	4.43472	4.58548e-26	1.06465e-23
ESC1_0104830	2.19	5.32193e-05	0.000772277
ESC1_0105270	3.15151	6.55979e-07	1.41838e-05
ESC1_0105650	6.11782	3.13466e-42	1.89229e-39
ESC1_0105730	1.69595	0.000184056	0.00229247
ESC1_0106450	2.1099	0.00169178	0.0156317
ESC1_0106460	2.44706	6.11401e-05	0.000870477
ESC1_0106930	2.45068	6.86734e-07	1.47705e-05
ESC1_0106990	2.41859	4.24456e-05	0.000625969
ESC1_0107080	2.46274	0.000633425	0.00673991
ESC1_0107420	2.26602	9.5218e-06	0.000160858
ESC1_0107580	3.21546	2.91247e-13	1.93915e-11
ESC1_0107630	2.28222	1.74495e-06	3.4957e-05
ESC1_0107870	3.05705	1.23787e-17	1.17988e-15
ESC1_0107890	2.21605	0.00291259	0.0248573
ESC1_0107930	3.04491	5.59758e-09	1.79738e-07
ESC1_0108150	3.32577	4.85284e-19	5.56234e-17
ESC1_0108600	2.29633	0.000275136	0.0032695
ESC1_0108690	2.70821	1.76451e-08	5.17076e-07
ESC1_0108780	2.61998	0.00232712	0.0205782
ESC1_0108840	2.52335	8.19475e-05	0.00111584
ESC1_0108850	3.27859	5.60306e-08	1.5328e-06
ESC1_0108870	2.52478	3.76418e-05	0.000561527
ESC1_0109000	3.24222	1.28098e-05	0.000210513
ESC1_0109130	1.89903	0.00608852	0.0466821
ESC1_0109190	2.27328	0.00483172	0.0385473
ESC1_0109470	2.113	0.00353593	0.0294282
ESC1_0109510	4.35329	5.2907e-13	3.23698e-11
ESC1_0109520	2.1674	0.0010136	0.0102435
ESC1_0109530	2.04135	9.52485e-07	2.00576e-05
ESC1_0109570	5.46182	6.04132e-07	1.31817e-05
ESC1_0109690	3.69657	3.67637e-08	1.03064e-06
ESC1_0109710	2.33816	4.71849e-06	8.70182e-05
ESC1_0109760	3.31256	2.26913e-11	1.05912e-09
ESC1_0109980	2.68194	1.04514e-16	9.27817e-15
ESC1_0110920	2.04617	0.00302078	0.0256596
ESC1_0111050	2.22954	0.000621633	0.00664568
ESC1_0111090	1.93668	0.00216647	0.0193656
ESC1_0111430	5.96821	0.000177676	0.00223143
ESC1_0111990	3.51367	8.10576e-11	3.47856e-09
ESC1_0112000	1.8717	2.49392e-06	4.85644e-05
ESC1_0112130	3.65478	5.39426e-17	4.93384e-15
ESC1_0112240	2.25999	0.00227087	0.0201398
ESC1_0112340	3.46886	3.85122e-13	2.43866e-11
ESC1_0112450	1.98205	8.08089e-05	0.00110366
ESC1_0112460	2.60383	7.40905e-06	0.000129515
ESC1_0112620	3.67133	0.00407582	0.0333996
ESC1_0112800	2.69358	5.05613e-05	0.000736065
ESC1_0112840	3.85547	1.29403e-11	6.266e-10
ESC1_0113400	1.95416	0.0036993	0.030619
ESC1_0113420	1.73615	0.00439695	0.0355838
ESC1_0113730	6.66519	1.6239e-43	1.22537e-40
ESC1_0114010	3.32559	8.92384e-08	2.34899e-06
ESC1_0114200	2.27911	0.000691428	0.00728856
ESC1_0114220	2.22511	0.00117375	0.0115777
ESC1_0114280	1.9145	0.00148791	0.0140784
ESC1_0114340	2.5474	4.835e-08	1.34297e-06
ESC1_0114410	3.78105	1.3853e-10	5.72779e-09
ESC1_0114420	3.72484	1.98386e-19	2.39518e-17
ESC1_0115720	2.45572	1.03993e-11	5.20254e-10
ESC1_0115730	6.17678	1.04666e-17	1.01909e-15
ESC1_0115920	2.06583	0.00206067	0.0185297
ESC1_0115930	2.01931	1.36258e-05	0.000223113
ESC1_0116080	2.00945	0.00133895	0.0128707
ESC1_0116750	3.03858	0.00336025	0.0282779
ESC1_0116800	3.64062	5.03834e-09	1.6352e-07
ESC1_0116820	4.53405	2.70102e-10	1.06802e-08
ESC1_0116860	3.00514	7.7038e-10	2.76817e-08
ESC1_0117030	2.46492	0.00088187	0.00901745
ESC1_0117080	3.27402	2.3473e-07	5.63788e-06
ESC1_0117100	2.53187	0.00290248	0.0248119
ESC1_0117120	2.92882	7.66039e-10	2.76548e-08
ESC1_0117150	4.50661	1.34474e-09	4.68332e-08
ESC1_0117200	2.39168	1.65645e-05	0.000266889
ESC1_0117260	2.49929	7.03035e-11	3.06918e-09
ESC1_0117300	1.61418	0.00297705	0.0253357
ESC1_0117340	2.52196	5.92216e-15	4.58334e-13
ESC1_0117360	1.51317	0.00482536	0.0385305
ESC1_0117480	2.03028	0.00438044	0.0355102
ESC1_0117550	2.12376	5.87129e-09	1.87861e-07
ESC1_0117750	3.15538	8.77065e-07	1.85991e-05
ESC1_0117930	4.16125	5.02583e-12	2.70886e-10
ESC1_0118050	5.96423	0.00209843	0.0187945
ESC1_0118060	5.80314	0.00288983	0.0247329
ESC1_0200390	1.97508	0.00117735	0.0116005
ESC1_0200700	2.24707	0.000547327	0.0059212
ESC1_0200820	2.17277	1.30682e-05	0.000214371
ESC1_0200990	2.00971	0.0058756	0.0453568
ESC1_0201300	2.42494	1.51533e-06	3.07652e-05
ESC1_0201570	4.67235	3.58018e-17	3.30801e-15
ESC1_0201970	3.20256	4.96375e-10	1.84208e-08
ESC1_0202010	2.59756	2.99554e-10	1.15424e-08
ESC1_0202040	2.66794	6.97139e-06	0.000123293
ESC1_0202050	2.77167	0.00470943	0.0377046
ESC1_0202120	2.13577	0.000435046	0.00486164
ESC1_0202330	2.83195	7.50399e-06	0.00013042
ESC1_0202530	2.08897	2.50291e-07	5.96416e-06
ESC1_0202750	2.3075	0.000272126	0.00324224
ESC1_0202960	2.98587	2.39939e-10	9.57113e-09
ESC1_0203000	3.66521	6.02763e-10	2.20972e-08
ESC1_0203370	2.42898	0.00101864	0.01026
ESC1_0203580	1.67156	0.00128113	0.0123824
ESC1_0203600	2.09716	0.00136484	0.0130918
ESC1_0204100	3.05685	4.56978e-07	1.02678e-05
ESC1_0204140	2.24262	0.000766131	0.00794775
ESC1_0204280	2.06196	0.000427257	0.00478222
ESC1_0204610	2.12056	0.000424802	0.00476062
ESC1_0204930	2.39706	0.00141219	0.0134888
ESC1_0205020	2.09461	9.3083e-05	0.00125613
ESC1_0205040	2.20476	6.94048e-06	0.000123192
ESC1_0205060	1.82468	0.00012392	0.00160769
ESC1_0205390	2.67517	4.48038e-07	1.0092e-05
ESC1_0205460	2.27717	9.54411e-05	0.00128033
ESC1_0205670	2.37346	3.35497e-06	6.40912e-05
ESC1_0205710	4.05812	2.50824e-11	1.15878e-09
ESC1_0205720	4.0047	5.68078e-21	8.71856e-19
ESC1_0205870	1.81144	0.00546809	0.0427578
ESC1_0205900	3.50686	1.11008e-11	5.46294e-10
ESC1_0205910	2.10018	1.73896e-06	3.49142e-05
ESC1_0206210	2.5252	5.40225e-05	0.000780861
ESC1_0206230	4.11827	3.16135e-28	8.41943e-26
ESC1_0206320	5.46461	1.92364e-43	1.33989e-40
ESC1_0206480	2.19753	0.000304605	0.00356817
ESC1_0206540	2.1384	0.00010351	0.00137836
ESC1_0206640	2.41952	9.42316e-06	0.000159788
ESC1_0206950	2.17482	0.00125744	0.0122828
ESC1_0207000	2.70388	1.42258e-05	0.000231681
ESC1_0207530	2.37338	0.000501693	0.00547519
ESC1_0207820	2.38101	3.50523e-07	8.06729e-06
ESC1_0208040	2.00472	0.00588549	0.0453945
ESC1_0208420	2.79227	3.19267e-07	7.50899e-06
ESC1_0208550	2.17082	0.000293844	0.00345553
ESC1_0208960	2.36084	0.00160934	0.0150078
ESC1_0209030	2.92517	3.44626e-07	7.98105e-06
ESC1_0209220	2.67831	0.000289546	0.00342143
ESC1_0209630	6.76247	0.00239537	0.0210583
ESC1_0209740	6.2314	0.00152827	0.0144001
ESC1_0209880	3.64362	1.2823e-09	4.50049e-08
ESC1_0209950	2.52126	1.15078e-06	2.38452e-05
ESC1_0209980	2.29237	0.00108776	0.0108238
ESC1_0209990	2.46595	4.58476e-13	2.8631e-11
ESC1_0210080	3.04199	1.05631e-05	0.0001768
ESC1_0210960	2.50183	0.000108303	0.00143585
ESC1_0211100	2.62325	1.75189e-06	3.49865e-05
ESC1_0211160	1.8453	0.00277921	0.0238991
ESC1_0211210	2.02902	0.000281813	0.00334008
ESC1_0211690	3.79102	6.30454e-12	3.26215e-10
ESC1_0211720	6.10099	3.05346e-22	5.12019e-20
ESC1_0211960	2.52902	3.9064e-05	0.000579925
ESC1_0212000	3.86963	8.10325e-28	2.03819e-25
ESC1_0212080	3.59568	2.65916e-06	5.15603e-05
ESC1_0212100	2.47436	0.000457683	0.00508002
ESC1_0212150	3.11531	1.50096e-08	4.47078e-07
ESC1_0212500	1.98957	0.00193668	0.0175894
ESC1_0212810	2.6834	0.00011062	0.00145591
ESC1_0213080	1.81011	0.00640375	0.0488097
ESC1_0213280	2.8032	6.04205e-09	1.92644e-07
ESC1_0213290	2.60997	5.51808e-05	0.000793115
ESC1_0213370	5.04886	2.33823e-13	1.59193e-11
ESC1_0213450	2.96274	2.57883e-09	8.71316e-08
ESC1_0213620	3.88331	1.45398e-11	6.96602e-10
ESC1_0213710	5.62408	2.71037e-07	6.4247e-06
ESC1_0213810	2.28484	0.00486469	0.0387665
ESC1_0213950	2.94002	6.05935e-07	1.31893e-05
ESC1_0214000	2.4319	0.00344709	0.0289013
ESC1_0214100	2.84173	0.000118281	0.00154998
ESC1_0214120	2.76308	9.92036e-05	0.00132491
ESC1_0214210	2.93655	0.00101578	0.010251
ESC1_0214290	1.85919	0.0065516	0.0496857
ESC1_0214810	1.97091	0.000696262	0.00733099
ESC1_0214890	5.53787	2.87003e-05	0.000443483
ESC1_0215060	3.27781	2.93035e-06	5.65764e-05
ESC1_0215880	2.6453	2.5274e-06	4.91108e-05
ESC1_0216000	1.94024	0.0047607	0.0380478
ESC1_0216010	3.30221	4.40966e-11	1.97671e-09
ESC1_0216030	2.47122	4.47902e-06	8.29397e-05
ESC1_0216450	3.28987	3.11274e-13	2.02776e-11
ESC1_0216470	2.27076	0.00121279	0.0118979
ESC1_0216580	2.36253	0.000465304	0.00515708
ESC1_0216620	2.32601	0.000320328	0.00372345
ESC1_0216640	3.9616	6.31485e-14	4.46727e-12
ESC1_0217040	2.48543	1.10794e-07	2.8746e-06
ESC1_0217230	3.36426	2.12931e-09	7.30337e-08
ESC1_0217270	3.31511	6.09536e-05	0.000870477
ESC1_0217360	2.69756	5.74301e-07	1.26528e-05
ESC1_0217590	2.65617	0.000142879	0.0018456
ESC1_0217750	3.38907	9.22215e-05	0.00124816
ESC1_0217770	6.20518	0.00256188	0.0223056
ESC1_0218040	4.15769	0.000151675	0.00194328
ESC1_0218350	2.12332	8.391e-05	0.00114085
ESC1_0218430	2.06205	0.00643454	0.0490032
ESC1_0218500	6.71325	5.06285e-24	9.94294e-22
ESC1_0218520	2.2646	0.000862256	0.00883228
ESC1_0218740	2.1169	0.00246095	0.021572
ESC1_0218840	2.41402	0.00257085	0.0223454
ESC1_0218890	1.86536	0.0013975	0.0133626
ESC1_0218960	1.96386	0.000970854	0.00985547
ESC1_0219190	3.11179	6.8711e-11	3.02028e-09
ESC1_0219210	5.8297	2.33449e-07	5.62203e-06
ESC1_0219290	3.21256	2.82689e-09	9.41927e-08
ESC1_0219460	2.85607	4.90725e-05	0.000715542
ESC1_0219980	3.12217	1.16864e-10	4.87651e-09
ESC1_0220010	6.02138	1.47612e-06	3.01041e-05
ESC1_0220030	5.64599	4.25734e-07	9.61352e-06
ESC1_0300720	3.67372	0.000283497	0.00335564
ESC1_0301430	1.97024	0.00424702	0.0345523
ESC1_0301540	3.08806	0.000472054	0.00521911
ESC1_0301840	2.46739	0.00148736	0.0140784
ESC1_0302110	1.79648	0.00527091	0.041323
ESC1_0302170	3.88111	0.00235308	0.0207672
ESC1_0302180	3.74821	0.000120869	0.00157933
ESC1_0302400	3.00473	3.4112e-08	9.62257e-07
ESC1_0302550	2.58074	1.8749e-07	4.62593e-06
ESC1_0302800	3.62519	3.03182e-08	8.60599e-07
ESC1_0302940	4.90104	9.85728e-23	1.75015e-20
ESC1_0303230	2.17839	0.00243267	0.0213655
ESC1_0303570	3.07308	3.87963e-20	5.09131e-18
ESC1_0303920	1.90435	0.000475129	0.00524031
ESC1_0304300	2.50133	3.79686e-07	8.63833e-06
ESC1_0304830	2.83781	0.00273804	0.0236123
ESC1_0304890	1.91768	0.000141466	0.00182996
ESC1_0305240	3.19675	1.98267e-11	9.35055e-10
ESC1_0305460	2.96449	1.65175e-06	3.34586e-05
ESC1_0305600	2.23375	0.00351765	0.029357
ESC1_0305820	3.06622	7.44997e-21	1.12432e-18
ESC1_0306090	3.09331	0.00353391	0.0294282
ESC1_0306280	3.42862	1.80136e-06	3.57704e-05
ESC1_0306340	1.73987	0.00363887	0.0302571
ESC1_0306440	2.06118	6.63427e-05	0.00092849
ESC1_0306880	2.24193	0.00106749	0.0106455
ESC1_0307020	2.09056	0.000253644	0.00305013
ESC1_0307050	2.64969	5.87167e-06	0.000106763
ESC1_0307560	2.67155	1.21593e-11	5.95149e-10
ESC1_0307800	2.08222	1.35198e-06	2.776e-05
ESC1_0308120	2.25961	3.9945e-09	1.30108e-07
ESC1_0308130	2.01396	0.00307785	0.0260466
ESC1_0308140	2.46535	1.47337e-10	6.03682e-09
ESC1_0308540	2.01708	0.00126717	0.0123511
ESC1_0308680	2.29071	1.75619e-06	3.49865e-05
ESC1_0309280	1.75255	0.000982491	0.00996243
ESC1_0309510	1.84052	0.000123928	0.00160769
ESC1_0309590	4.24699	0.000293497	0.00345553
ESC1_0310110	2.21257	0.000168593	0.00213511
ESC1_0310150	2.14085	0.000183199	0.00228494
ESC1_0310750	2.16594	0.00235678	0.0207796
ESC1_0311020	2.1573	0.000946455	0.00962938
ESC1_0311210	1.82964	0.00153473	0.014446
ESC1_0311350	3.61133	2.7607e-11	1.25619e-09
ESC1_0311420	2.33698	0.00626327	0.0478598
ESC1_0311490	1.92197	0.000205981	0.00253763
ESC1_0311660	3.88123	5.14542e-09	1.66399e-07
ESC1_0311850	2.10107	1.14915e-05	0.000190578
ESC1_0312070	2.94496	2.63799e-08	7.55917e-07
ESC1_0312660	1.89488	0.000553428	0.00598006
ESC1_0312790	2.19662	0.000671084	0.00709891
ESC1_0400130	2.50432	0.000643277	0.00682869
ESC1_0400880	1.92978	0.00102402	0.0103028
ESC1_0401100	4.92411	3.28965e-31	9.60895e-29
ESC1_0401150	2.02374	0.0012713	0.0123781
ESC1_0401180	2.7631	8.05548e-08	2.13907e-06
ESC1_0401460	2.36051	0.00131649	0.0126682
ESC1_0401530	2.78469	0.000411863	0.00465595
ESC1_0401880	2.23925	0.00206607	0.0185598
ESC1_0401910	2.23169	0.00524504	0.0411559
ESC1_0401950	3.13523	2.42741e-09	8.23228e-08
ESC1_0401970	2.70906	1.45312e-10	5.98092e-09
ESC1_0402010	2.15395	0.000216585	0.0026431
ESC1_0402390	2.65695	5.16274e-07	1.1458e-05
ESC1_0402410	3.06563	8.54554e-07	1.8207e-05
ESC1_0402900	1.91953	0.00630503	0.0480978
ESC1_0403020	2.31824	1.00802e-05	0.000169658
ESC1_0403030	3.01052	1.13723e-05	0.000188946
ESC1_0403050	2.31081	0.000116371	0.00152716
ESC1_0403150	2.41737	0.000451897	0.00502694
ESC1_0403180	2.75736	2.33144e-07	5.62203e-06
ESC1_0403310	9.26365	3.38636e-123	3.06635e-119
ESC1_0403550	2.32021	8.99479e-05	0.00122073
ESC1_0403680	2.08859	8.33196e-06	0.00014262
ESC1_0403970	3.45298	0.00607885	0.0466475
ESC1_0404000	4.28099	5.13919e-13	3.16567e-11
ESC1_0404080	1.88207	0.00503895	0.0398495
ESC1_0404440	2.1293	0.00128263	0.0123824
ESC1_0404490	5.17545	1.89622e-15	1.57526e-13
ESC1_0404600	2.02789	0.00558636	0.0435698
ESC1_0404620	3.53532	1.00024e-08	3.07024e-07
ESC1_0404800	2.50169	3.84794e-09	1.26243e-07
ESC1_0404810	2.27357	0.000110201	0.00145341
ESC1_0405470	1.87869	0.00105896	0.0105721
ESC1_0405550	3.18028	1.46222e-11	6.96864e-10
ESC1_0406120	3.43815	1.28992e-11	6.266e-10
ESC1_0406410	5.49091	7.93686e-19	8.55574e-17
ESC1_0406580	3.80736	2.48048e-10	9.85121e-09
ESC1_0406750	2.49293	0.000380622	0.00434072
ESC1_0406980	3.59005	1.76868e-07	4.39984e-06
ESC1_0407150	2.51486	0.000314915	0.00366995
ESC1_0407170	2.2161	0.0024704	0.021634
ESC1_0407760	3.76056	5.57515e-09	1.79655e-07
ESC1_0408030	2.38007	4.75384e-05	0.00069429
ESC1_0408170	3.12091	8.71218e-09	2.71095e-07
ESC1_0408440	2.61891	0.000157612	0.0020101
ESC1_0408540	2.50689	0.000727632	0.00761709
ESC1_0408610	3.03712	7.88941e-09	2.47192e-07
ESC1_0408950	2.68918	1.04664e-06	2.1787e-05
ESC1_0408960	5.56414	1.87047e-07	4.62593e-06
ESC1_0409090	2.29015	5.93443e-06	0.000107044
ESC1_0409310	1.73996	0.000203895	0.00251535
ESC1_0409730	1.70436	0.000887227	0.00905732
ESC1_0409940	2.20866	6.99973e-05	0.000969153
ESC1_0410060	2.56178	0.00586967	0.0453497
ESC1_0410160	3.63528	1.24088e-08	3.74539e-07
ESC1_0410370	3.11146	1.26775e-05	0.000208717
ESC1_0410490	2.31068	6.36656e-05	0.000895174
ESC1_0410640	2.368	5.6684e-07	1.25189e-05
ESC1_0410800	2.20741	3.73824e-05	0.000560084
ESC1_0410900	2.7694	6.94149e-05	0.000964036
ESC1_0411020	3.23199	4.69101e-07	1.04623e-05
ESC1_0411260	1.99885	0.000260801	0.00311962
ESC1_0411270	2.24043	0.000482702	0.0053052
ESC1_0411430	3.81606	7.05012e-11	3.06918e-09
ESC1_0411440	5.08893	2.93911e-14	2.14626e-12
ESC1_0411770	2.59855	3.69703e-11	1.6655e-09
ESC1_0411800	1.9762	0.00500791	0.0396734
ESC1_0411900	2.48589	0.000466028	0.00515879
ESC1_0412510	4.17278	4.76038e-10	1.78657e-08
ESC1_0412570	2.98469	0.000111385	0.00146385
ESC1_0412960	7.49844	1.87658e-05	0.000298112
ESC1_0413090	2.09696	6.48343e-05	0.000908784
ESC1_0413180	2.06181	0.00195287	0.0177187
ESC1_0413360	2.78451	5.04237e-08	1.39629e-06
ESC1_0413370	3.0172	6.95208e-06	0.000123192
ESC1_0413540	2.18087	0.00151933	0.0143307
ESC1_0414020	2.98289	1.79065e-15	1.50133e-13
ESC1_0414040	2.05694	0.0056854	0.0440765
ESC1_0414110	2.70457	1.65538e-06	3.34586e-05
ESC1_0414170	2.16443	0.00232054	0.0205401
ESC1_0414200	2.41314	6.35361e-07	1.37966e-05
ESC1_0414420	2.16923	9.23544e-05	0.00124816
ESC1_0414480	4.674	3.37586e-05	0.000515487
ESC1_0414620	1.85864	0.00488848	0.0388974
ESC1_0414860	3.62085	2.30382e-07	5.60782e-06
ESC1_0414900	3.81195	2.41344e-12	1.349e-10
ESC1_0415140	3.6368	0.000529048	0.00573716
ESC1_0500160	5.82465	8.48691e-06	0.000144998
ESC1_0500660	1.70373	0.004935	0.0392331
ESC1_0500960	1.88979	0.000257353	0.00308245
ESC1_0500990	2.49169	0.00262946	0.0227627
ESC1_0501130	3.30396	0.000180352	0.00225253
ESC1_0501140	3.44343	8.57615e-12	4.31428e-10
ESC1_0501170	4.62804	1.96939e-11	9.33654e-10
ESC1_0501190	4.02811	1.14338e-36	3.98205e-34
ESC1_0501680	1.82889	0.00461753	0.0371991
ESC1_0502410	3.16257	4.66836e-07	1.04623e-05
ESC1_0502450	5.36009	6.67617e-06	0.000119236
ESC1_0502470	2.18683	0.0036507	0.0303276
ESC1_0502630	4.36925	1.38713e-12	7.89964e-11
ESC1_0502800	4.60153	5.16089e-24	9.94294e-22
ESC1_0503080	2.08556	0.000567867	0.00612148
ESC1_0503190	3.6229	2.82689e-12	1.56082e-10
ESC1_0503400	6.8649	4.45665e-19	5.17371e-17
ESC1_0503410	3.43054	1.49615e-12	8.46727e-11
ESC1_0503420	2.33956	0.000105012	0.0013963
ESC1_0503460	3.15891	5.06169e-08	1.39737e-06
ESC1_0503500	3.81488	1.9872e-07	4.88971e-06
ESC1_0503580	2.2613	0.000388507	0.00441951
ESC1_0503830	2.50853	0.000220795	0.00268723
ESC1_0504020	1.91847	0.00245631	0.0215522
ESC1_0504160	2.50366	1.09332e-05	0.00018232
ESC1_0504190	2.21752	1.52261e-07	3.82979e-06
ESC1_0504220	2.33659	6.74919e-08	1.81347e-06
ESC1_0504290	2.67287	2.62834e-05	0.000408222
ESC1_0504300	2.36794	6.79609e-10	2.47143e-08
ESC1_0504550	2.81533	3.60898e-06	6.85101e-05
ESC1_0504580	4.69229	2.20102e-39	9.0592e-37
ESC1_0504790	2.13985	0.000773121	0.0080007
ESC1_0505100	3.15794	1.08032e-08	3.28266e-07
ESC1_0505270	1.82264	0.00503691	0.0398495
ESC1_0505330	1.96621	0.00187799	0.0171597
ESC1_0505340	1.79694	0.00287702	0.0246699
ESC1_0506120	2.99658	7.80233e-12	4.00413e-10
ESC1_0506260	1.8011	0.000787234	0.00813745
ESC1_0506320	1.95529	0.00226204	0.0201009
ESC1_0507280	3.17649	0.00143218	0.013608
ESC1_0507400	3.75781	1.08506e-18	1.12934e-16
ESC1_0508310	4.69412	6.10546e-05	0.000870477
ESC1_0508440	1.9005	0.000675926	0.00714179
ESC1_0508590	2.19298	0.00253881	0.022126
ESC1_0508700	2.09653	0.000349547	0.00403204
ESC1_0508790	3.65463	0.000339258	0.00392836
ESC1_0508840	3.23442	3.04158e-11	1.37708e-09
ESC1_0508850	1.69622	0.00380598	0.0314445
ESC1_0508950	2.03774	0.00141661	0.0135026
ESC1_0509040	2.16853	0.000173335	0.00218296
ESC1_0509400	2.14701	0.000819746	0.00844459
ESC1_0509500	3.21362	1.07342e-09	3.8267e-08
ESC1_0509710	3.37587	0.000223536	0.00271694
ESC1_0509890	2.41341	0.000214235	0.00262148
ESC1_0509920	2.62629	1.00063e-06	2.09254e-05
ESC1_0509950	2.80538	5.93125e-06	0.000107044
ESC1_0510030	2.06282	0.00127269	0.0123783
ESC1_0510320	1.99879	0.0035109	0.0293422
ESC1_0510450	2.43921	9.76989e-07	2.05258e-05
ESC1_0510550	2.23903	7.63525e-06	0.000132194
ESC1_0510800	1.70406	0.00647253	0.0491684
ESC1_0510860	3.54291	3.24053e-20	4.37955e-18
ESC1_0511060	2.43256	9.36752e-05	0.00126218
ESC1_0511100	8.04511	9.91259e-21	1.47145e-18
ESC1_0511230	2.95561	2.64815e-09	8.91414e-08
ESC1_0511440	2.00895	0.00197999	0.0179077
ESC1_0511480	1.83511	0.000501873	0.00547519
ESC1_0511590	3.37506	7.7562e-08	2.06566e-06
ESC1_0511630	1.58201	0.00323591	0.0273332
ESC1_0512300	1.65674	0.00591476	0.0455426
ESC1_0512530	2.66639	7.52308e-05	0.00103844
ESC1_0513190	2.10605	0.00323223	0.0273276
ESC1_0513200	3.0032	3.09907e-06	5.95798e-05
ESC1_0513230	2.04439	0.00196042	0.0177694
ESC1_0513250	3.39395	0.00103936	0.0104108
ESC1_0513300	1.88435	0.00496884	0.0394121
ESC1_0513420	2.1999	0.000882326	0.00901745
ESC1_0513580	4.45418	7.48085e-20	9.54072e-18
ESC1_0513890	1.88958	0.000846401	0.00867968
ESC1_0513940	2.004	0.00462622	0.0372359
ESC1_0600590	2.77122	6.55528e-06	0.000117308
ESC1_0600670	1.73648	0.00038306	0.00436303
ESC1_0600760	3.30471	1.36214e-13	9.41541e-12
ESC1_0600810	2.23244	0.000355163	0.00408641
ESC1_0600960	3.15679	3.59678e-05	0.00054372
ESC1_0601000	7.42835	1.56998e-05	0.00025386
ESC1_0601020	2.17334	0.00510002	0.0402622
ESC1_0601170	3.00254	2.42313e-07	5.78931e-06
ESC1_0601500	2.54995	5.26924e-12	2.82326e-10
ESC1_0601520	2.95007	1.67613e-18	1.70532e-16
ESC1_0601730	4.91725	0.000621	0.00664568
ESC1_0601770	1.89345	0.00178966	0.0164188
ESC1_0602140	1.91451	0.000457791	0.00508002
ESC1_0602280	2.24536	3.22129e-07	7.53714e-06
ESC1_0602440	2.67056	4.93209e-13	3.05891e-11
ESC1_0602480	1.93534	0.000122328	0.00159378
ESC1_0602550	2.93257	9.88197e-09	3.04358e-07
ESC1_0602590	2.21666	3.4048e-05	0.000519032
ESC1_0602660	4.0169	1.06873e-33	3.337e-31
ESC1_0602750	1.68553	0.00454172	0.0366535
ESC1_0603020	2.11403	3.97435e-06	7.43549e-05
ESC1_0603040	1.85858	0.00399098	0.032734
ESC1_0603380	2.75258	6.42757e-08	1.73219e-06
ESC1_0603460	5.31169	6.55116e-19	7.33424e-17
ESC1_0603590	3.01478	0.00463757	0.0372941
ESC1_0603930	3.30204	8.4213e-20	1.0591e-17
ESC1_0603960	2.63352	7.19827e-08	1.92272e-06
ESC1_0603980	2.7449	5.40696e-05	0.000780861
ESC1_0604530	3.0686	3.54028e-07	8.11575e-06
ESC1_0604610	3.67613	2.74275e-08	7.83456e-07
ESC1_0604690	2.85823	2.93136e-10	1.13434e-08
ESC1_0604980	1.95848	0.00073659	0.00770187
ESC1_0605110	1.95686	0.000496307	0.00544075
ESC1_0605520	2.34561	0.000254246	0.00305331
ESC1_0605530	1.72171	0.0049455	0.039282
ESC1_0605810	2.64513	0.000624785	0.0066715
ESC1_0605820	3.53995	5.57709e-08	1.53032e-06
ESC1_0605900	3.43133	1.04872e-12	6.08726e-11
ESC1_0605910	2.77849	3.15155e-05	0.000482049
ESC1_0606310	3.05199	0.00112051	0.0111131
ESC1_0606960	2.37367	0.00261981	0.0227009
ESC1_0607150	1.82641	0.00470601	0.0377046
ESC1_0607200	4.27951	2.58064e-15	2.10519e-13
ESC1_0607460	1.51203	0.00603763	0.0464098
ESC1_0607470	3.66965	1.57815e-08	4.65477e-07
ESC1_0607660	4.47345	3.762e-37	1.41937e-34
ESC1_0607800	4.87448	7.09828e-06	0.000124596
ESC1_0608510	3.13237	7.87408e-09	2.47192e-07
ESC1_0608740	2.79354	0.00149436	0.0141226
ESC1_0608880	2.34301	3.02818e-05	0.000466329
ESC1_0609020	2.43954	0.000267282	0.00319293
ESC1_0609110	4.26925	4.80177e-10	1.7893e-08
ESC1_0609150	2.2295	0.00223912	0.0199559
ESC1_0609180	1.98934	0.000103234	0.00137671
ESC1_0609280	3.34991	0.000394411	0.00446982
ESC1_0609420	1.80741	0.000414214	0.00467087
ESC1_0609580	4.46651	0.000240666	0.00292122
ESC1_0609610	1.75272	0.00392794	0.0322754
ESC1_0609660	1.72114	0.00200762	0.0180886
ESC1_0609740	3.77689	5.5857e-18	5.49767e-16
ESC1_0609910	2.6029	0.00572076	0.0443126
ESC1_0610560	2.54866	0.00188545	0.0172104
ESC1_0610640	2.50361	8.66883e-07	1.84263e-05
ESC1_0610820	2.27386	6.73335e-05	0.000938008
ESC1_0610830	2.56158	4.25394e-05	0.000626333
ESC1_0611580	2.1238	0.000251482	0.00303218
ESC1_0611650	1.82989	0.00143123	0.013608
ESC1_0611800	2.52597	0.000167979	0.00213032
ESC1_0611940	2.10906	0.00288503	0.0247151
ESC1_0611950	2.24064	5.43639e-06	9.96488e-05
ESC1_0612120	3.52969	6.79478e-16	5.75016e-14
ESC1_0612340	4.74788	0.000203778	0.00251535
ESC1_0612470	1.96555	0.000578835	0.00621617
ESC1_0612490	2.47669	1.02759e-05	0.000172311
ESC1_0612900	3.49296	3.14679e-10	1.20738e-08
ESC1_0613110	3.076	6.56072e-19	7.33424e-17
ESC1_0613270	3.44858	2.33827e-08	6.743e-07
ESC1_0613290	2.74875	1.52773e-08	4.5356e-07
ESC1_0613460	2.13258	0.00120408	0.0118253
ESC1_0700360	2.79709	0.00020925	0.00257091
ESC1_0700550	2.02264	3.31453e-07	7.71544e-06
ESC1_0700660	2.15572	0.00647125	0.0491684
ESC1_0700860	2.44492	0.000711904	0.00747588
ESC1_0701160	3.78046	0.000270273	0.0032244
ESC1_0701410	2.05161	0.000389173	0.00442154
ESC1_0702480	2.70841	9.42686e-08	2.47421e-06
ESC1_0702670	1.77745	0.000763942	0.00794202
ESC1_0702710	3.49055	2.12031e-11	9.94788e-10
ESC1_0703190	3.21501	0.00397699	0.0326488
ESC1_0703440	2.42644	0.00234531	0.0207188
ESC1_0703870	2.29997	3.08404e-06	5.9417e-05
ESC1_0703950	1.64998	0.00275266	0.0237158
ESC1_0704450	2.75666	2.33778e-05	0.000366238
ESC1_0704460	3.97075	7.90005e-06	0.000135998
ESC1_0704810	2.38596	3.17468e-07	7.48614e-06
ESC1_0705060	1.80489	0.00558349	0.0435698
ESC1_0705160	1.88208	0.00153834	0.0144649
ESC1_0705210	2.92625	5.84688e-10	2.15217e-08
ESC1_0705300	2.60725	2.38657e-07	5.71704e-06
ESC1_0705330	2.61382	0.000317151	0.00369126
ESC1_0705390	1.681	0.00303092	0.025705
ESC1_0705420	2.2784	0.00112286	0.0111241
ESC1_0705530	3.40784	1.2112e-24	2.49259e-22
ESC1_0705620	2.20191	0.0024776	0.021676
ESC1_0706050	2.88897	9.3108e-07	1.96984e-05
ESC1_0706250	4.15453	3.30921e-13	2.14035e-11
ESC1_0706280	3.29234	1.70242e-08	5.00501e-07
ESC1_0706320	3.38148	0.00173817	0.0160113
ESC1_0706630	2.36431	0.00470064	0.0377009
ESC1_0706730	3.0174	5.87524e-12	3.09304e-10
ESC1_0706980	2.66524	4.37868e-06	8.12478e-05
ESC1_0707270	2.31305	2.02925e-07	4.97963e-06
ESC1_0707410	2.71764	0.00048277	0.0053052
ESC1_0707780	3.01773	0.00167826	0.0155544
ESC1_0707990	1.78877	0.00386767	0.0318669
ESC1_0708320	2.07055	0.000217799	0.00265433
ESC1_0708790	2.76019	2.15341e-09	7.35817e-08
ESC1_0708820	2.5627	3.51023e-07	8.06729e-06
ESC1_0708860	2.74411	1.18724e-06	2.45445e-05
ESC1_0708870	2.92272	2.14803e-06	4.22834e-05
ESC1_0708890	2.27674	0.000986571	0.00999262
ESC1_0709080	1.94846	0.000416515	0.00468514
ESC1_0709120	2.02321	7.75335e-06	0.000133727
ESC1_0709130	1.82203	0.00367857	0.0305283
ESC1_0709340	1.92856	0.00433711	0.035222
ESC1_0709460	4.04426	2.74436e-10	1.07577e-08
ESC1_0709470	3.07628	9.38099e-05	0.00126218
ESC1_0709820	2.84026	1.11798e-07	2.89238e-06
ESC1_0709970	4.45273	2.90113e-16	2.52594e-14
ESC1_0710050	1.88943	0.000923262	0.00940397
ESC1_0710480	2.28715	6.30681e-05	0.000890922
ESC1_0710490	2.8234	0.00326836	0.0275559
ESC1_0710550	3.22962	1.3794e-19	1.6879e-17
ESC1_0710560	2.56472	1.23137e-06	2.53988e-05
ESC1_0710950	1.93177	0.00110505	0.0109838
ESC1_0710980	6.1029	0.00177682	0.0163176
ESC1_0711180	2.14908	4.37349e-05	0.000641847
ESC1_0711210	1.81202	0.00217513	0.0194239
ESC1_0711220	1.66813	0.00226192	0.0201009
ESC1_0711390	3.45948	0.00123417	0.0120815
ESC1_0711410	2.50105	0.00273777	0.0236123
ESC1_0711850	3.06785	1.45611e-05	0.000236716
ESC1_0711930	2.24342	0.00369685	0.030619
ESC1_0712210	2.00808	9.00548e-05	0.00122073
ESC1_0712480	2.98515	8.76466e-11	3.74358e-09
ESC1_0712690	10.01	7.82231e-106	2.36104e-102
ESC1_0712760	2.10265	0.00473714	0.037893
ESC1_0712820	2.00505	0.00384842	0.0317372
ESC1_0712940	1.95313	0.00177107	0.0162813
ESC1_0713120	3.52012	0.00464766	0.0373421
ESC1_0713720	2.34075	1.68804e-05	0.000271496
ESC1_0713860	2.83483	0.000145431	0.00187322
ESC1_0714130	1.82299	0.00192666	0.0175164
ESC1_0714140	2.84678	4.68944e-07	1.04623e-05
ESC1_0714200	2.60949	0.00197535	0.0178868
ESC1_0714300	2.06906	0.00330312	0.027823
ESC1_0714550	1.82233	0.00184991	0.0169373
ESC1_0714570	11.1842	5.93201e-13	3.60499e-11
ESC1_0714650	4.13348	0.0034679	0.029022
ESC1_0800070	4.95959	1.44293e-06	2.94937e-05
ESC1_0800110	1.74798	0.000210813	0.0025866
ESC1_0800260	3.82383	5.96358e-07	1.30703e-05
ESC1_0800450	2.74262	2.11418e-05	0.000333089
ESC1_0801720	1.87371	0.00652523	0.0495272
ESC1_0801770	2.07815	3.09405e-05	0.000474055
ESC1_0801820	3.9468	8.57641e-22	1.38677e-19
ESC1_0802100	3.73915	0.00018807	0.00233925
ESC1_0802270	1.90338	1.76177e-05	0.000282352
ESC1_0802580	2.51452	0.00214304	0.0191751
ESC1_0802620	3.69905	4.44899e-11	1.98451e-09
ESC1_0802920	2.25801	9.84999e-07	2.06462e-05
ESC1_0803160	3.29555	6.18606e-08	1.67208e-06
ESC1_0803220	6.82887	0.00144863	0.0137498
ESC1_0803260	3.37579	6.14686e-05	0.000873781
ESC1_0803340	4.33734	5.9348e-12	3.10633e-10
ESC1_0803360	2.80598	0.00187028	0.0171065
ESC1_0803400	3.58004	0.000641769	0.00682068
ESC1_0804030	2.60693	0.000343021	0.00396687
ESC1_0804110	1.96442	0.000406848	0.00460501
ESC1_0804470	2.01775	0.000123839	0.00160769
ESC1_0805010	2.30426	7.87698e-09	2.47192e-07
ESC1_0805070	2.55927	3.91916e-06	7.36265e-05
ESC1_0805140	3.11271	3.96312e-06	7.42982e-05
ESC1_0805150	2.19423	0.00104054	0.0104111
ESC1_0805550	2.73648	6.84719e-07	1.47622e-05
ESC1_0805680	1.80869	0.00165231	0.0153453
ESC1_0805750	1.53543	0.00221292	0.0197419
ESC1_0805870	2.23929	0.000498511	0.00545831
ESC1_0806110	3.54969	4.01664e-08	1.12255e-06
ESC1_0806180	3.86465	1.48108e-28	4.06399e-26
ESC1_0806600	2.39345	5.89949e-06	0.000107044
ESC1_0806670	2.0608	0.00343628	0.0288641
ESC1_0807630	2.39551	0.000144923	0.00186935
ESC1_0807770	2.62482	5.82267e-06	0.000106299
ESC1_0808020	2.04967	0.00566513	0.0439775
ESC1_0808110	2.61999	0.00165963	0.0153975
ESC1_0808140	2.06082	0.000273171	0.00325041
ESC1_0808180	2.24366	4.23767e-05	0.000625969
ESC1_0808390	2.84054	1.49163e-06	3.03523e-05
ESC1_0808440	5.28744	1.32695e-11	6.39126e-10
ESC1_0808470	3.10288	0.000106379	0.00141241
ESC1_0808480	3.07821	5.9337e-06	0.000107044
ESC1_0808660	2.1559	0.00157412	0.0147401
ESC1_0808800	2.32114	2.30558e-05	0.000361821
ESC1_0808900	1.95375	0.00118437	0.011657
ESC1_0809040	2.23769	7.92206e-05	0.00108524
ESC1_0809090	2.07915	0.00198162	0.0179077
ESC1_0809890	4.15758	0.00325398	0.0274602
ESC1_0809970	2.25277	0.000303391	0.00355856
ESC1_0810050	3.0067	5.09537e-10	1.88321e-08
ESC1_0810060	1.91543	0.00174753	0.0160812
ESC1_0810220	2.04175	0.000990201	0.0100182
ESC1_0810270	4.14862	0.00024431	0.00295718
ESC1_0810310	4.19446	1.19638e-16	1.05177e-14
ESC1_0810440	2.40501	3.23348e-09	1.0647e-07

## Sheet: ESC1_ESE1_down
GeneID	Log2FC	P-value	FDR
ESC1_0100070	-6.6577	0.000246414	0.00382953
ESC1_0100610	-3.24376	3.85837e-09	1.87595e-07
ESC1_0100800	-2.96876	0.000122746	0.00204256
ESC1_0100990	-3.22837	8.60348e-07	2.42317e-05
ESC1_0101410	-3.01253	0.000229909	0.00361826
ESC1_0103880	-2.25955	0.00228525	0.0250801
ESC1_0104150	-2.04961	0.000216806	0.00344948
ESC1_0104270	-2.63701	3.50002e-05	0.00067094
ESC1_0104420	-3.58538	0.00323382	0.0337862
ESC1_0104520	-6.00082	5.45807e-14	5.16321e-12
ESC1_0105220	-2.47527	0.00335542	0.0347731
ESC1_0106350	-9.05804	2.28856e-07	7.57312e-06
ESC1_0106730	-2.15327	0.00290554	0.0309131
ESC1_0106900	-3.09378	0.000131805	0.00217254
ESC1_0107230	-2.55747	0.000884829	0.0111928
ESC1_0107690	-2.22726	5.55664e-05	0.00100749
ESC1_0107830	-3.14613	0.00310724	0.0326993
ESC1_0108760	-5.02217	2.76673e-14	2.70549e-12
ESC1_0109840	-2.11209	1.0939e-07	3.83879e-06
ESC1_0110180	-3.52796	7.11514e-07	2.0641e-05
ESC1_0110830	-2.92956	6.13652e-18	8.6139e-16
ESC1_0111270	-2.54506	0.000529741	0.00727183
ESC1_0111610	-1.56028	0.00454129	0.0450659
ESC1_0112360	-2.69405	0.00313447	0.0329063
ESC1_0113190	-2.42439	5.86847e-06	0.000139544
ESC1_0114050	-2.47555	8.28767e-07	2.34943e-05
ESC1_0114080	-3.57781	8.53619e-15	8.95066e-13
ESC1_0115110	-2.33432	6.20893e-05	0.00111645
ESC1_0116290	-2.86166	0.000403975	0.00581123
ESC1_0116390	-5.59308	1.7222e-11	1.11024e-09
ESC1_0117530	-4.97046	9.77555e-44	7.08972e-41
ESC1_0201220	-2.74823	0.00423207	0.0425309
ESC1_0201370	-2.31044	4.63382e-07	1.42e-05
ESC1_0201930	-4.99453	8.46985e-26	2.30353e-23
ESC1_0202110	-2.304	0.0012424	0.0149346
ESC1_0202720	-2.79419	0.00120226	0.0145323
ESC1_0202850	-2.85926	0.00495091	0.0482506
ESC1_0204320	-1.89977	0.00092601	0.0116461
ESC1_0204330	-3.09993	2.11475e-12	1.57305e-10
ESC1_0204490	-1.91466	0.000297035	0.00444939
ESC1_0204890	-2.70459	0.00115604	0.0140517
ESC1_0204900	-4.6432	2.09278e-08	8.71459e-07
ESC1_0205430	-6.77054	2.085e-10	1.15578e-08
ESC1_0206180	-3.3431	3.94377e-08	1.56987e-06
ESC1_0206700	-2.22945	0.000347717	0.00512044
ESC1_0207200	-3.19415	0.000213612	0.00340489
ESC1_0207930	-2.28489	1.46329e-07	4.99413e-06
ESC1_0208400	-2.22123	0.00448291	0.0446393
ESC1_0208670	-5.62214	3.9838e-05	0.000752082
ESC1_0208680	-3.33748	4.41654e-05	0.000823065
ESC1_0209840	-2.07978	0.00155726	0.0181674
ESC1_0210300	-2.99251	0.000354859	0.00520799
ESC1_0211220	-2.41648	0.00047219	0.00660687
ESC1_0211340	-2.07614	0.000494	0.00684599
ESC1_0211610	-3.05312	0.00116703	0.0141457
ESC1_0212200	-3.57786	6.18914e-07	1.8259e-05
ESC1_0212310	-2.33792	0.000268377	0.0040977
ESC1_0213190	-2.28722	0.00114287	0.013911
ESC1_0213200	-2.24018	0.00062769	0.00832742
ESC1_0213250	-2.67546	1.43917e-06	3.87773e-05
ESC1_0213580	-1.96025	0.00344757	0.0356768
ESC1_0213890	-2.73828	0.0039938	0.0405106
ESC1_0214560	-2.57634	0.000259455	0.00398244
ESC1_0215510	-2.41504	1.24597e-08	5.56085e-07
ESC1_0215930	-2.49946	1.35998e-07	4.67822e-06
ESC1_0216260	-2.42645	0.00101592	0.0125865
ESC1_0216720	-4.20149	1.38343e-05	0.00030025
ESC1_0217080	-1.80828	0.000435761	0.00617659
ESC1_0217760	-5.68055	8.35171e-14	7.73244e-12
ESC1_0217960	-3.66679	0.000486907	0.00678009
ESC1_0217970	-9.03245	1.46016e-13	1.31008e-11
ESC1_0218590	-1.91221	0.000925494	0.0116461
ESC1_0218830	-3.34673	8.99149e-07	2.52429e-05
ESC1_0219450	-1.95262	0.00329087	0.034218
ESC1_0220070	-3.27711	1.05366e-13	9.6526e-12
ESC1_0220170	-3.11212	4.30909e-08	1.69692e-06
ESC1_0300420	-2.52535	2.11413e-05	0.000434971
ESC1_0300880	-2.65889	3.44098e-05	0.00066284
ESC1_0301250	-3.17317	4.86134e-06	0.000118179
ESC1_0301470	-5.00071	0.00468849	0.046263
ESC1_0301480	-3.55542	0.000120339	0.00201019
ESC1_0303020	-2.0185	0.0048554	0.0474174
ESC1_0303150	-4.81132	0.00130642	0.0155325
ESC1_0303960	-1.94069	0.00104266	0.0128714
ESC1_0304440	-2.35056	6.38879e-05	0.00114407
ESC1_0305390	-2.38721	6.58769e-05	0.00117485
ESC1_0306600	-2.46041	0.000385904	0.00557196
ESC1_0307320	-2.24004	0.000149875	0.00245642
ESC1_0307410	-2.46627	1.11565e-08	5.02271e-07
ESC1_0307420	-2.71836	2.09082e-06	5.46439e-05
ESC1_0307470	-2.45849	0.00165222	0.01897
ESC1_0307750	-1.76612	0.00171538	0.0195918
ESC1_0308920	-2.20786	4.13433e-06	0.00010251
ESC1_0310570	-3.06	8.7022e-12	6.05882e-10
ESC1_0310850	-3.3216	5.07161e-07	1.5325e-05
ESC1_0311570	-2.44717	0.00315832	0.0330768
ESC1_0311840	-7.22451	1.11962e-08	5.02271e-07
ESC1_0311910	-9.72627	1.02795e-07	3.65154e-06
ESC1_0312710	-3.58266	2.33161e-20	4.14122e-18
ESC1_0400220	-3.70591	0.00199926	0.022451
ESC1_0400550	-3.28753	0.00208794	0.023237
ESC1_0400990	-2.1518	7.71946e-06	0.000178203
ESC1_0401490	-2.10455	0.000129616	0.00214405
ESC1_0402260	-2.62545	2.60884e-12	1.90796e-10
ESC1_0402300	-1.87244	9.24629e-05	0.00159033
ESC1_0402350	-2.59781	5.49017e-07	1.63075e-05
ESC1_0402770	-2.43985	3.13966e-05	0.000615416
ESC1_0403330	-1.87067	0.00348179	0.0359882
ESC1_0403390	-3.0774	1.67916e-10	9.48944e-09
ESC1_0403410	-2.77789	1.41054e-12	1.08637e-10
ESC1_0403930	-1.9386	0.0036086	0.0372104
ESC1_0404060	-4.58563	6.28695e-29	1.88673e-26
ESC1_0404710	-1.69443	0.00185825	0.0210577
ESC1_0405080	-1.8446	0.000641304	0.00845647
ESC1_0405110	-2.8977	6.19023e-10	3.24786e-08
ESC1_0406430	-3.25287	6.57903e-06	0.000154659
ESC1_0406590	-2.46837	6.96718e-07	2.02794e-05
ESC1_0406690	-2.83775	0.00294331	0.0312386
ESC1_0407040	-1.98013	0.00383942	0.0390813
ESC1_0407210	-3.0804	0.00475957	0.0468163
ESC1_0407400	-2.93906	0.000632402	0.00836443
ESC1_0407410	-2.57118	3.00482e-05	0.000595693
ESC1_0407580	-2.26734	0.00498713	0.0485492
ESC1_0407790	-1.79036	0.000531412	0.00728327
ESC1_0408160	-3.82142	1.82634e-07	6.08991e-06
ESC1_0408660	-2.96818	1.68461e-14	1.68519e-12
ESC1_0408880	-5.54901	8.49402e-15	8.95066e-13
ESC1_0408970	-1.76957	0.00187775	0.021251
ESC1_0409990	-2.7809	0.00452829	0.045029
ESC1_0410010	-4.21593	1.37825e-09	6.97377e-08
ESC1_0410070	-4.27922	0.000459744	0.00647259
ESC1_0410090	-1.68659	0.00290111	0.0309038
ESC1_0410240	-6.93442	4.10647e-53	5.10552e-50
ESC1_0410300	-2.45225	0.000333206	0.00492342
ESC1_0410390	-1.85059	0.00352212	0.0363618
ESC1_0411080	-3.34239	0.00148269	0.0174376
ESC1_0411200	-3.30693	1.26453e-08	5.6149e-07
ESC1_0413350	-1.76597	0.00103261	0.0127654
ESC1_0414680	-2.21998	0.00068808	0.00899153
ESC1_0414820	-3.86052	2.90295e-07	9.32264e-06
ESC1_0501280	-2.60682	4.85153e-07	1.47632e-05
ESC1_0501750	-2.66572	7.12506e-05	0.0012578
ESC1_0501880	-3.953	0.00204759	0.0229051
ESC1_0502180	-3.41048	1.48305e-13	1.31704e-11
ESC1_0502240	-1.9729	0.0039329	0.039986
ESC1_0502710	-2.82866	0.00380947	0.038913
ESC1_0502750	-2.5559	0.00157174	0.0182628
ESC1_0502950	-3.32108	2.12107e-13	1.86462e-11
ESC1_0503110	-3.03087	0.000386061	0.00557196
ESC1_0503280	-5.42265	2.8934e-37	1.57383e-34
ESC1_0504210	-2.40312	0.00316729	0.0331309
ESC1_0505160	-1.71394	0.00241504	0.0262726
ESC1_0505250	-2.17923	0.00199566	0.0224396
ESC1_0506430	-2.38714	0.00045057	0.00636576
ESC1_0506630	-4.89443	0.000104238	0.00176151
ESC1_0507660	-2.84397	1.06619e-06	2.94573e-05
ESC1_0507690	-4.35368	4.26069e-05	0.000795725
ESC1_0507980	-2.29115	0.000585625	0.00788962
ESC1_0509150	-3.74007	1.53207e-05	0.000326805
ESC1_0509440	-2.15148	0.00414434	0.041891
ESC1_0511720	-2.4027	1.26523e-05	0.000277362
ESC1_0512030	-2.22156	8.10081e-06	0.000186019
ESC1_0512190	-2.38813	0.000142818	0.00234519
ESC1_0512320	-2.13046	0.000218193	0.0034652
ESC1_0512930	-2.33917	0.000364351	0.00532474
ESC1_0512940	-2.42667	0.000415608	0.0059323
ESC1_0513040	-2.55583	0.000942023	0.0117993
ESC1_0513210	-2.83139	1.52408e-06	4.08124e-05
ESC1_0600210	-3.48559	7.4328e-10	3.80516e-08
ESC1_0600460	-6.22114	2.55062e-16	3.26442e-14
ESC1_0601570	-3.85412	1.59701e-08	6.92881e-07
ESC1_0601620	-2.34375	0.000167057	0.00270744
ESC1_0601670	-2.38996	4.83982e-08	1.8804e-06
ESC1_0601880	-1.9879	1.49027e-05	0.000319453
ESC1_0602370	-6.76027	0.00125053	0.0149909
ESC1_0603120	-1.92767	1.03026e-05	0.000231092
ESC1_0603220	-2.85195	3.33125e-07	1.05043e-05
ESC1_0603490	-2.11158	7.42451e-10	3.80516e-08
ESC1_0603540	-2.46973	0.00260633	0.0281775
ESC1_0604210	-1.97457	0.00207509	0.0231236
ESC1_0604360	-2.25811	0.00107027	0.0131376
ESC1_0604780	-2.16279	1.41322e-07	4.84224e-06
ESC1_0604920	-3.488	1.18698e-05	0.000261526
ESC1_0605690	-2.39472	0.00477825	0.0469358
ESC1_0605760	-4.48178	3.74187e-08	1.50071e-06
ESC1_0607230	-2.25063	0.000792809	0.0101918
ESC1_0607700	-2.92477	0.000106469	0.00179226
ESC1_0607820	-4.78528	0.000372899	0.00542699
ESC1_0607990	-3.12973	0.00125346	0.0150054
ESC1_0608120	-2.44371	0.00204143	0.0228655
ESC1_0608690	-2.85761	0.00156455	0.018228
ESC1_0608850	-4.68605	3.9491e-22	7.9928e-20
ESC1_0609090	-2.32651	0.00476071	0.0468163
ESC1_0609270	-2.02428	0.000452804	0.00638696
ESC1_0609920	-5.12726	9.33017e-12	6.44448e-10
ESC1_0610100	-1.97812	8.00204e-05	0.00139005
ESC1_0610210	-1.98317	0.000671336	0.00881243
ESC1_0610540	-4.81773	1.88695e-11	1.20751e-09
ESC1_0610650	-2.34217	0.00112968	0.0138084
ESC1_0610670	-1.64909	0.00370137	0.0380768
ESC1_0610710	-1.75691	0.000320831	0.00478116
ESC1_0611160	-2.70722	2.89504e-13	2.44617e-11
ESC1_0611770	-3.90777	6.37724e-10	3.32342e-08
ESC1_0611970	-3.69998	1.10021e-05	0.000244887
ESC1_0612830	-3.3214	1.22055e-05	0.000268243
ESC1_0613040	-2.2796	0.000159541	0.0025953
ESC1_0613090	-4.31326	0.00147247	0.0173644
ESC1_0700260	-3.41423	0.000151873	0.00248449
ESC1_0700700	-2.76204	0.00222317	0.0245225
ESC1_0700930	-3.50785	2.18993e-06	5.65548e-05
ESC1_0701040	-1.91638	0.00417891	0.0421426
ESC1_0702390	-2.24858	5.26533e-07	1.57471e-05
ESC1_0703110	-3.97831	0.00025915	0.00398244
ESC1_0703280	-2.51007	2.31009e-05	0.000468642
ESC1_0705150	-3.78115	0.00422781	0.0425309
ESC1_0705860	-5.87081	6.05914e-11	3.63674e-09
ESC1_0705900	-3.07083	0.00122298	0.0147214
ESC1_0706700	-2.79466	8.79773e-08	3.27208e-06
ESC1_0706790	-1.75988	0.000741891	0.00957963
ESC1_0707260	-1.65761	0.000494883	0.00684732
ESC1_0707600	-2.91443	0.000348637	0.00512531
ESC1_0707760	-2.06446	0.00152942	0.0179146
ESC1_0708950	-2.64095	1.4107e-05	0.000304648
ESC1_0709810	-1.58987	0.00464291	0.0459173
ESC1_0709930	-2.32075	0.000466787	0.00655233
ESC1_0710850	-2.48644	0.000267185	0.00408666
ESC1_0711970	-3.98576	6.93858e-42	4.31332e-39
ESC1_0712190	-2.00619	0.000240039	0.00374383
ESC1_0712800	-2.49204	0.000279884	0.00422888
ESC1_0712910	-3.33654	7.67253e-33	3.17972e-30
ESC1_0713220	-2.1866	9.45306e-07	2.64534e-05
ESC1_0713790	-3.27222	0.000158613	0.00258989
ESC1_0714110	-4.35715	4.85094e-07	1.47632e-05
ESC1_0714590	-4.28034	0.000564994	0.0076591
ESC1_0800120	-2.96817	1.30624e-05	0.000284917
ESC1_0800250	-1.78018	8.66053e-06	0.000196795
ESC1_0801490	-2.39351	0.00036835	0.00536977
ESC1_0801660	-2.19336	0.00213521	0.0236421
ESC1_0801860	-3.74019	0.000231371	0.0036347
ESC1_0802130	-2.72458	0.00271159	0.0290986
ESC1_0802540	-2.31039	0.000251956	0.00390868
ESC1_0802950	-2.06304	0.00142554	0.0168795
ESC1_0803260	-2.17381	0.00373526	0.0383349
ESC1_0803550	-2.01898	0.000985214	0.0122841
ESC1_0803560	-2.31762	6.6385e-06	0.000155309
ESC1_0803590	-2.49844	7.9546e-07	2.2698e-05
ESC1_0803700	-2.88283	6.467e-13	5.11657e-11
ESC1_0804090	-1.88581	0.0041976	0.0422821
ESC1_0804180	-4.16289	1.74378e-07	5.8595e-06
ESC1_0804230	-4.53898	1.03389e-11	7.02965e-10
ESC1_0804880	-2.04971	2.19138e-08	8.99604e-07
ESC1_0806270	-1.65557	0.00377059	0.0385611
ESC1_0806570	-2.00095	0.00461318	0.0456752
ESC1_0807340	-1.89477	0.00270639	0.0290787
ESC1_0807390	-3.43099	6.3608e-14	5.95248e-12
ESC1_0807460	-2.62548	0.00128185	0.0153031
ESC1_0808640	-2.80268	3.45105e-15	3.75431e-13
ESC1_0809960	-2.24593	0.000377127	0.00547445

## Sheet: ESC1_ESE2_down
GeneID	Log2FC	P-value	FDR
ESC1_0100070	-10.2602	1.48205e-09	5.14175e-08
ESC1_0100380	-5.69943	2.55753e-11	1.17555e-09
ESC1_0100520	-2.14399	6.16837e-06	0.000111043
ESC1_0100610	-2.96192	2.66431e-07	6.33211e-06
ESC1_0100800	-2.56622	0.00249243	0.0217847
ESC1_0100830	-2.18902	4.61265e-06	8.52399e-05
ESC1_0100960	-9.62505	7.71035e-78	1.74543e-74
ESC1_0100990	-7.61751	1.55829e-48	1.41103e-45
ESC1_0101350	-4.37539	2.42352e-05	0.000378361
ESC1_0101580	-2.31816	0.000569489	0.00613166
ESC1_0101690	-2.47674	1.32813e-07	3.38766e-06
ESC1_0101910	-2.83139	0.00154111	0.0144759
ESC1_0102600	-1.82346	0.00072764	0.00761709
ESC1_0102660	-4.00421	0.00560583	0.0436464
ESC1_0102760	-2.0296	0.000700133	0.00736319
ESC1_0102850	-1.91636	0.000289811	0.00342143
ESC1_0103620	-4.32162	7.7262e-05	0.00106323
ESC1_0104150	-2.27215	7.68162e-06	0.000132742
ESC1_0104520	-5.34862	7.6054e-11	3.27938e-09
ESC1_0104550	-2.98726	0.000798512	0.00824461
ESC1_0104680	-3.51193	6.9084e-06	0.000122899
ESC1_0104820	-2.13621	3.07953e-05	0.00047263
ESC1_0104900	-5.62242	3.61102e-55	4.67111e-52
ESC1_0105110	-3.41297	2.11514e-05	0.000333089
ESC1_0105220	-5.37812	1.02483e-18	1.07905e-16
ESC1_0105230	-3.07895	0.00148447	0.0140752
ESC1_0105790	-2.4741	0.0020027	0.0180622
ESC1_0105870	-7.08322	8.82582e-42	4.70104e-39
ESC1_0106340	-2.19437	0.00424454	0.0345523
ESC1_0106620	-2.74	1.22812e-05	0.000202932
ESC1_0106900	-4.49166	1.7177e-10	6.97479e-09
ESC1_0107290	-2.32579	1.15531e-09	4.10247e-08
ESC1_0107340	-3.75309	0.00251092	0.0219252
ESC1_0107540	-3.54647	4.72003e-11	2.09509e-09
ESC1_0107820	-5.87804	2.65126e-15	2.1435e-13
ESC1_0107830	-3.38952	0.00103927	0.0104108
ESC1_0108760	-3.73516	3.20549e-07	7.51961e-06
ESC1_0109050	-3.89508	2.63282e-05	0.000408222
ESC1_0109390	-2.21831	0.000195345	0.00241977
ESC1_0109840	-2.06196	4.15853e-07	9.41388e-06
ESC1_0109870	-2.82704	1.71319e-09	5.92096e-08
ESC1_0110250	-1.62675	0.00130243	0.0125463
ESC1_0110330	-2.58102	2.88527e-06	5.5825e-05
ESC1_0110490	-2.96736	2.21178e-06	4.34439e-05
ESC1_0110830	-2.17836	1.61791e-07	4.04702e-06
ESC1_0110970	-1.85971	0.00257139	0.0223454
ESC1_0111250	-7.06626	0.00225386	0.0200676
ESC1_0111270	-3.3232	1.77897e-07	4.4133e-06
ESC1_0111470	-4.54444	1.36318e-07	3.46731e-06
ESC1_0111700	-4.82565	4.09122e-19	4.81117e-17
ESC1_0112100	-2.26519	0.00032813	0.00380438
ESC1_0112110	-3.94004	1.85019e-21	2.9392e-19
ESC1_0112230	-3.11311	1.01906e-07	2.65926e-06
ESC1_0112300	-2.32294	3.82593e-06	7.20246e-05
ESC1_0112360	-7.87004	4.69342e-34	1.51782e-31
ESC1_0113080	-2.43987	2.79791e-09	9.38338e-08
ESC1_0113380	-2.07091	0.00127594	0.0123824
ESC1_0113890	-2.9696	0.000748399	0.00781632
ESC1_0114050	-2.19333	7.54205e-05	0.00103947
ESC1_0114080	-8.49681	3.34778e-115	1.51571e-111
ESC1_0114150	-2.1761	5.0804e-08	1.39827e-06
ESC1_0114450	-2.45562	0.000150332	0.00193086
ESC1_0114460	-3.36938	1.96205e-14	1.48434e-12
ESC1_0114700	-4.27276	2.31623e-06	4.5299e-05
ESC1_0114860	-1.91722	4.19207e-05	0.000620248
ESC1_0114960	-1.80001	0.00275969	0.0237538
ESC1_0115290	-7.1969	7.43428e-05	0.00102775
ESC1_0115350	-2.23976	3.8278e-05	0.000570077
ESC1_0115410	-2.94929	3.07666e-14	2.22873e-12
ESC1_0115560	-3.55037	1.68629e-10	6.87807e-09
ESC1_0115750	-3.91678	0.00258952	0.0224814
ESC1_0116210	-3.38861	2.05674e-05	0.000325022
ESC1_0116290	-3.76327	1.38424e-07	3.51099e-06
ESC1_0116390	-6.68875	7.3487e-17	6.58836e-15
ESC1_0116590	-4.14798	2.78411e-20	3.81972e-18
ESC1_0116830	-4.41654	4.91257e-14	3.50263e-12
ESC1_0117010	-2.13962	3.65439e-06	6.9227e-05
ESC1_0117230	-1.79803	0.00155702	0.014595
ESC1_0117530	-5.20065	1.24726e-48	1.25488e-45
ESC1_0117630	-2.61678	1.4143e-05	0.000230747
ESC1_0117640	-2.23655	0.000178643	0.00223736
ESC1_0200200	-6.14745	0.00230233	0.0203988
ESC1_0200620	-1.92931	0.00646192	0.0491684
ESC1_0200650	-2.81128	0.00509935	0.0402622
ESC1_0201380	-3.98762	7.61482e-42	4.30951e-39
ESC1_0201740	-4.66144	3.48378e-15	2.74309e-13
ESC1_0202110	-2.50785	0.000190309	0.00236061
ESC1_0202240	-5.81593	0.00383359	0.0316437
ESC1_0202660	-6.89923	0.00142472	0.0135655
ESC1_0202720	-3.91039	1.49398e-07	3.76823e-06
ESC1_0202800	-3.92072	1.10593e-20	1.6152e-18
ESC1_0202850	-4.02708	4.0981e-06	7.63545e-05
ESC1_0203020	-1.68737	0.00278859	0.023957
ESC1_0203220	-2.25665	1.04059e-08	3.18328e-07
ESC1_0203540	-4.10671	0.000656346	0.00695112
ESC1_0204330	-3.62731	1.46982e-18	1.51241e-16
ESC1_0204420	-2.50719	1.53916e-08	4.55462e-07
ESC1_0204530	-2.02576	6.79925e-05	0.000945733
ESC1_0204630	-1.76067	0.000309528	0.00361648
ESC1_0204810	-3.3271	1.93035e-10	7.73421e-09
ESC1_0204870	-5.20425	0.00171183	0.0157848
ESC1_0204890	-2.80067	0.000628255	0.00670065
ESC1_0204900	-6.97934	2.07867e-20	2.94099e-18
ESC1_0205170	-5.01173	0.00110648	0.0109859
ESC1_0205220	-2.56043	1.13052e-07	2.91271e-06
ESC1_0205430	-5.64022	3.78356e-07	8.62975e-06
ESC1_0205480	-2.09875	0.000478977	0.00527633
ESC1_0205540	-2.72619	0.000766249	0.00794775
ESC1_0205570	-2.05074	6.9522e-05	0.000964045
ESC1_0205590	-2.72609	1.05533e-08	3.21751e-07
ESC1_0206200	-4.26967	0.00102566	0.0103078
ESC1_0206700	-3.35768	5.77495e-12	3.05802e-10
ESC1_0206710	-3.59976	2.32397e-07	5.62203e-06
ESC1_0206740	-1.95206	0.000206598	0.00254177
ESC1_0206990	-1.8066	0.00341991	0.0287533
ESC1_0207130	-3.70031	0.00522092	0.0410377
ESC1_0207200	-3.61175	1.06972e-05	0.000178714
ESC1_0208090	-2.32489	0.000170066	0.00214777
ESC1_0208350	-5.68195	1.75885e-22	3.06276e-20
ESC1_0208650	-3.11977	1.53366e-12	8.62566e-11
ESC1_0208670	-6.72343	3.43755e-07	7.98105e-06
ESC1_0208680	-3.37068	3.73569e-05	0.000560084
ESC1_0208740	-2.24267	0.00514155	0.0405194
ESC1_0209270	-2.31571	4.0667e-05	0.000602684
ESC1_0209490	-2.91992	3.90673e-05	0.000579925
ESC1_0210220	-7.88733	0.00011027	0.00145341
ESC1_0210230	-5.40392	2.32463e-07	5.62203e-06
ESC1_0210870	-2.09464	1.48652e-05	0.000241226
ESC1_0211120	-1.76395	7.89185e-05	0.00108274
ESC1_0211410	-2.54991	1.63879e-05	0.000264514
ESC1_0211650	-2.21141	0.000373538	0.00427069
ESC1_0211840	-2.50006	6.73205e-05	0.000938008
ESC1_0211930	-2.60998	4.4351e-08	1.23569e-06
ESC1_0212060	-5.81263	6.53425e-06	0.000117164
ESC1_0212200	-3.32616	7.53733e-06	0.000130748
ESC1_0212560	-3.85923	1.5554e-05	0.000251953
ESC1_0212600	-6.72125	0.00168484	0.0155994
ESC1_0212640	-3.61564	1.22394e-07	3.13072e-06
ESC1_0212660	-3.58546	0.00279259	0.0239687
ESC1_0213200	-2.52864	2.6222e-05	0.000407972
ESC1_0213310	-2.0994	0.0056509	0.0439218
ESC1_0213350	-2.16602	0.000214192	0.00262148
ESC1_0213390	-4.2933	1.10681e-19	1.3729e-17
ESC1_0213580	-2.87916	9.24177e-09	2.8659e-07
ESC1_0213720	-3.95178	0.00423709	0.0345523
ESC1_0214350	-2.50705	4.12061e-07	9.35142e-06
ESC1_0214520	-2.01448	0.00103204	0.0103604
ESC1_0214770	-1.80942	0.00260436	0.0225886
ESC1_0215070	-6.09612	2.89533e-07	6.84522e-06
ESC1_0215230	-1.80077	0.00344334	0.0288966
ESC1_0215240	-2.17634	0.000753612	0.00785309
ESC1_0215510	-2.55078	4.77471e-10	1.78657e-08
ESC1_0216080	-3.20976	1.09312e-07	2.84432e-06
ESC1_0216260	-2.51639	0.000502472	0.00547519
ESC1_0216480	-2.15501	0.000833352	0.00856527
ESC1_0217080	-2.11321	1.28066e-06	2.63555e-05
ESC1_0217110	-8.75514	4.74291e-12	2.57168e-10
ESC1_0217120	-8.00069	2.64376e-25	5.83885e-23
ESC1_0217130	-11.4465	2.57525e-08	7.40281e-07
ESC1_0217760	-3.32922	0.00030795	0.00360269
ESC1_0217970	-8.43112	8.34476e-12	4.22133e-10
ESC1_0218100	-3.29908	0.000435427	0.00486164
ESC1_0218150	-2.02222	3.51858e-05	0.000533681
ESC1_0219360	-3.54941	2.91225e-12	1.59821e-10
ESC1_0219450	-2.22278	0.000161509	0.00205402
ESC1_0219560	-3.46584	0.00168874	0.0156196
ESC1_0219730	-1.93148	3.5747e-05	0.000541287
ESC1_0220070	-4.04852	2.41788e-23	4.46815e-21
ESC1_0220340	-6.73326	0.000712499	0.00747588
ESC1_0300170	-6.78938	8.09673e-12	4.11887e-10
ESC1_0300180	-5.41948	5.02223e-11	2.21836e-09
ESC1_0300240	-4.9895	2.85978e-09	9.48545e-08
ESC1_0300600	-3.59453	3.95934e-10	1.50008e-08
ESC1_0300880	-2.61762	5.46787e-05	0.000787147
ESC1_0300910	-2.45424	1.06483e-11	5.26929e-10
ESC1_0300920	-3.24446	4.99708e-16	4.30939e-14
ESC1_0301250	-3.12382	8.91576e-06	0.000152038
ESC1_0301420	-2.45222	1.10831e-05	0.00018448
ESC1_0302260	-4.79583	1.6011e-31	4.83265e-29
ESC1_0302340	-2.33327	0.00306506	0.0259627
ESC1_0302450	-5.46486	6.45121e-27	1.5788e-24
ESC1_0302910	-2.98301	0.000484673	0.00531965
ESC1_0303180	-2.21822	0.000954044	0.0096957
ESC1_0303320	-4.61124	1.82093e-24	3.66411e-22
ESC1_0303330	-1.86902	0.00190932	0.0174107
ESC1_0303670	-1.82763	0.00566778	0.0439775
ESC1_0304530	-2.42431	1.75802e-06	3.49865e-05
ESC1_0305560	-2.71698	1.25839e-08	3.7731e-07
ESC1_0305730	-4.70883	6.56325e-07	1.41838e-05
ESC1_0306230	-2.47122	0.00617158	0.0472789
ESC1_0306260	-2.52876	0.00560515	0.0436464
ESC1_0306550	-2.28428	5.85046e-06	0.000106591
ESC1_0306890	-4.76561	2.83588e-26	6.7576e-24
ESC1_0307320	-2.76191	7.16289e-08	1.91894e-06
ESC1_0307360	-3.67807	0.000391384	0.00444108
ESC1_0307410	-2.62284	2.7379e-10	1.07577e-08
ESC1_0307420	-2.11091	0.00226653	0.020121
ESC1_0307470	-4.49247	2.9366e-14	2.14626e-12
ESC1_0307820	-2.31652	0.000253022	0.00304669
ESC1_0308040	-1.96839	0.00266888	0.0230598
ESC1_0308110	-1.6399	0.00295314	0.0251558
ESC1_0308640	-3.00973	0.000555542	0.00599575
ESC1_0308770	-1.87526	5.13497e-06	9.43147e-05
ESC1_0308920	-1.94279	0.000356015	0.00409101
ESC1_0309200	-3.95659	0.000572146	0.00615294
ESC1_0309420	-1.73696	0.00457203	0.0368653
ESC1_0310380	-2.78473	0.000420027	0.00471294
ESC1_0310450	-2.8351	0.00126325	0.0123262
ESC1_0310530	-4.21571	0.00159874	0.0149243
ESC1_0310570	-3.44782	5.15689e-16	4.40525e-14
ESC1_0311010	-2.82383	1.32567e-10	5.50639e-09
ESC1_0311250	-3.54965	2.2711e-09	7.73114e-08
ESC1_0311270	-1.73508	0.00439738	0.0355838
ESC1_0311310	-2.93764	0.000443165	0.00493587
ESC1_0311360	-4.82695	6.19815e-13	3.74162e-11
ESC1_0311800	-2.25074	5.66505e-05	0.000811661
ESC1_0311840	-6.71091	1.70834e-07	4.26144e-06
ESC1_0311900	-2.21113	2.45797e-06	4.79675e-05
ESC1_0311910	-9.19359	5.97582e-07	1.30703e-05
ESC1_0311970	-3.09969	9.46808e-09	2.92606e-07
ESC1_0311980	-2.59401	0.00200098	0.0180622
ESC1_0312150	-3.12674	0.000167724	0.00213008
ESC1_0312190	-5.84515	0.00352447	0.0293868
ESC1_0312450	-4.79543	0.0039092	0.0321506
ESC1_0312570	-8.11197	2.67823e-05	0.000414554
ESC1_0312610	-4.32019	4.22266e-06	7.85137e-05
ESC1_0312710	-2.62238	6.65717e-09	2.10772e-07
ESC1_0400120	-3.35102	7.10012e-06	0.000124596
ESC1_0400270	-5.89617	0.0057897	0.0447701
ESC1_0400280	-2.99484	3.5037e-05	0.000532316
ESC1_0400410	-4.6169	1.79477e-05	0.00028612
ESC1_0401270	-2.12267	2.13831e-08	6.22584e-07
ESC1_0401490	-2.85616	1.1666e-10	4.87651e-09
ESC1_0402100	-5.0953	5.61953e-05	0.000806416
ESC1_0402260	-2.31035	2.29729e-08	6.6673e-07
ESC1_0402460	-4.62852	7.43295e-19	8.20797e-17
ESC1_0403280	-1.79586	0.000610245	0.00653938
ESC1_0403370	-2.05722	0.00170822	0.0157675
ESC1_0403390	-2.50205	4.04043e-06	7.54353e-05
ESC1_0403740	-4.47989	1.89076e-10	7.60926e-09
ESC1_0404020	-4.88035	2.97808e-09	9.84178e-08
ESC1_0404060	-3.48054	1.5958e-14	1.22457e-12
ESC1_0404730	-3.55918	2.68683e-18	2.67354e-16
ESC1_0404880	-3.00069	1.13228e-07	2.91271e-06
ESC1_0405110	-3.7173	7.78376e-19	8.4918e-17
ESC1_0405120	-2.19077	0.00621549	0.047575
ESC1_0405130	-2.00559	0.000311421	0.00363391
ESC1_0405190	-2.56654	3.76356e-05	0.000561527
ESC1_0405210	-6.67205	0.00113749	0.0112568
ESC1_0405300	-2.64186	0.000436367	0.00486614
ESC1_0405600	-6.26373	5.84264e-48	4.80956e-45
ESC1_0406430	-3.85601	1.10309e-08	3.34061e-07
ESC1_0406590	-3.93061	2.29632e-23	4.33192e-21
ESC1_0407650	-2.32797	0.00388016	0.0319408
ESC1_0407790	-2.03616	5.76249e-06	0.000105413
ESC1_0408000	-3.60477	3.57158e-19	4.25535e-17
ESC1_0408140	-3.56523	0.000290942	0.00343031
ESC1_0408160	-3.42492	9.51408e-06	0.000160858
ESC1_0408470	-1.96666	0.0012028	0.0118253
ESC1_0408790	-2.78579	1.08273e-12	6.24468e-11
ESC1_0408880	-4.28013	3.08313e-08	8.7243e-07
ESC1_0409290	-2.07317	0.0042413	0.0345523
ESC1_0409590	-4.48336	0.00141444	0.0134961
ESC1_0409830	-2.03912	0.000152201	0.00194384
ESC1_0409990	-5.49485	2.58924e-13	1.74967e-11
ESC1_0410010	-6.14829	2.89916e-22	4.95318e-20
ESC1_0410090	-2.00848	1.24932e-05	0.000206059
ESC1_0410120	-2.48709	8.72824e-08	2.3042e-06
ESC1_0410540	-2.68321	1.16535e-07	2.9893e-06
ESC1_0410950	-2.91367	3.63417e-05	0.000548456
ESC1_0411400	-2.41644	8.85236e-11	3.76329e-09
ESC1_0411630	-2.75736	0.00157881	0.0147535
ESC1_0411820	-5.57766	0.000119726	0.00156664
ESC1_0412430	-2.87741	1.20551e-05	0.000199559
ESC1_0412500	-2.80254	1.9838e-06	3.9307e-05
ESC1_0412750	-1.87671	0.00108227	0.010781
ESC1_0412920	-4.27842	1.21521e-13	8.53002e-12
ESC1_0412940	-4.12571	2.10264e-07	5.13191e-06
ESC1_0413350	-1.8967	0.000126673	0.00164095
ESC1_0414050	-3.96342	2.7033e-11	1.23628e-09
ESC1_0414220	-3.58221	5.65247e-12	3.01077e-10
ESC1_0414370	-3.81186	6.20548e-05	0.000879352
ESC1_0414450	-2.50545	5.95623e-07	1.30703e-05
ESC1_0414510	-4.52036	3.0359e-13	1.99204e-11
ESC1_0414650	-2.95525	5.71798e-08	1.55484e-06
ESC1_0414680	-3.01345	2.11138e-08	6.16727e-07
ESC1_0414800	-2.92446	4.31699e-10	1.62876e-08
ESC1_0414820	-5.71707	1.76669e-17	1.66639e-15
ESC1_0414830	-4.3932	1.2425e-39	5.35753e-37
ESC1_0414940	-4.51545	0.000256264	0.00307347
ESC1_0415170	-4.38535	0.00557084	0.0435237
ESC1_0500210	-3.1049	3.44619e-05	0.000524457
ESC1_0500640	-3.50038	0.00161396	0.0150354
ESC1_0501020	-2.38273	0.00423545	0.0345523
ESC1_0501110	-4.47513	0.000179064	0.00223954
ESC1_0501280	-1.91586	0.00436616	0.0354261
ESC1_0501310	-3.07001	6.79837e-17	6.15593e-15
ESC1_0501470	-2.08475	0.00486775	0.0387665
ESC1_0501570	-5.44819	0.000474102	0.00523536
ESC1_0501650	-4.85344	0.000159404	0.0020301
ESC1_0501870	-2.13694	2.2224e-05	0.000349372
ESC1_0501880	-5.41079	3.56877e-06	6.78891e-05
ESC1_0501990	-2.66321	3.32253e-06	6.36058e-05
ESC1_0502040	-9.13211	2.12296e-14	1.58871e-12
ESC1_0502050	-1.89257	0.00465353	0.0373561
ESC1_0502950	-2.03414	0.00121859	0.0119419
ESC1_0503000	-1.76326	0.00576772	0.0446382
ESC1_0503280	-5.39062	1.24234e-36	4.16643e-34
ESC1_0503600	-5.3489	5.67941e-20	7.34672e-18
ESC1_0503840	-2.81095	3.49205e-07	8.06646e-06
ESC1_0504110	-3.6175	3.7614e-10	1.43107e-08
ESC1_0504120	-5.67494	6.8889e-26	1.55947e-23
ESC1_0504150	-4.07175	1.24863e-08	3.75626e-07
ESC1_0504200	-2.14123	0.0013888	0.0132934
ESC1_0504210	-2.87537	8.07595e-05	0.00110366
ESC1_0504660	-8.11957	3.68846e-05	0.000555724
ESC1_0504900	-2.03578	0.000829366	0.00853398
ESC1_0504920	-3.08226	2.74058e-13	1.83822e-11
ESC1_0504950	-2.29664	0.000412709	0.0046597
ESC1_0504980	-2.5437	9.5595e-05	0.00128049
ESC1_0504990	-2.57401	2.66332e-12	1.47953e-10
ESC1_0505040	-3.64899	8.2538e-06	0.000141818
ESC1_0505160	-2.04342	9.38773e-06	0.000159486
ESC1_0505350	-2.27371	7.48887e-06	0.000130407
ESC1_0505780	-2.56142	3.89336e-13	2.44822e-11
ESC1_0505900	-3.93175	6.91618e-13	4.09321e-11
ESC1_0506370	-4.28126	3.46401e-20	4.61274e-18
ESC1_0506500	-2.60237	2.86816e-08	8.16705e-07
ESC1_0506510	-3.31685	0.000417371	0.00468895
ESC1_0506550	-6.088	0.00375113	0.0310197
ESC1_0506630	-4.64192	0.000299405	0.00351636
ESC1_0506920	-3.397	1.30269e-09	4.5544e-08
ESC1_0507410	-3.16941	0.000172745	0.00217856
ESC1_0507440	-3.4903	2.55823e-20	3.56382e-18
ESC1_0507640	-7.92715	2.0367e-05	0.000322418
ESC1_0507660	-2.14905	0.00265373	0.0229508
ESC1_0507670	-3.12805	0.000630527	0.00671697
ESC1_0507790	-3.09418	0.000152167	0.00194384
ESC1_0507830	-1.92033	4.4825e-05	0.00065678
ESC1_0508060	-5.96743	8.24663e-07	1.76116e-05
ESC1_0508070	-6.04173	2.1577e-18	2.17089e-16
ESC1_0508370	-1.99724	0.00204864	0.0184398
ESC1_0508530	-2.31351	0.000244609	0.00295718
ESC1_0508740	-1.8379	0.00590157	0.0454797
ESC1_0509070	-1.88872	0.00531214	0.0416102
ESC1_0509150	-4.06143	1.38762e-06	2.84273e-05
ESC1_0509440	-2.77827	9.28501e-06	0.000158037
ESC1_0509750	-2.43482	0.00134229	0.0128891
ESC1_0509780	-2.09678	4.35403e-05	0.000640028
ESC1_0510150	-2.45776	0.00128205	0.0123824
ESC1_0510410	-2.15921	1.98833e-06	3.93108e-05
ESC1_0510990	-2.66173	0.000688516	0.00726633
ESC1_0511130	-2.39247	6.70961e-06	0.000119597
ESC1_0511720	-3.02523	2.79336e-10	1.09025e-08
ESC1_0511820	-2.5563	0.00104294	0.0104236
ESC1_0511870	-1.9677	0.000121154	0.00158077
ESC1_0511880	-2.3267	0.00128268	0.0123824
ESC1_0511940	-1.80605	0.00129478	0.0124859
ESC1_0512030	-2.37144	5.47286e-07	1.21166e-05
ESC1_0512070	-4.89972	6.3287e-05	0.000892074
ESC1_0512120	-8.41662	6.11595e-41	2.91474e-38
ESC1_0512660	-3.61951	0.000241011	0.00292149
ESC1_0513040	-5.77622	7.22891e-25	1.52227e-22
ESC1_0513460	-3.96784	0.000151728	0.00194328
ESC1_0600210	-2.71293	2.39522e-05	0.000374588
ESC1_0600800	-2.11842	5.46733e-05	0.000787147
ESC1_0600830	-2.37944	0.00182151	0.0166941
ESC1_0600940	-1.85194	0.000178144	0.00223421
ESC1_0600980	-2.30998	0.00453913	0.0366535
ESC1_0601150	-2.28284	0.000803747	0.00828921
ESC1_0601400	-2.99579	6.78845e-10	2.47143e-08
ESC1_0601450	-3.94498	0.00252403	0.0220184
ESC1_0601570	-3.20173	1.6993e-05	0.000272823
ESC1_0601620	-3.81382	2.1528e-15	1.77215e-13
ESC1_0601670	-2.19146	3.23335e-06	6.20297e-05
ESC1_0601800	-4.68804	6.17871e-12	3.21542e-10
ESC1_0602070	-1.97694	0.00164261	0.0152865
ESC1_0602310	-3.50847	6.33466e-05	0.000892074
ESC1_0602390	-2.36612	8.14261e-05	0.00111041
ESC1_0602410	-2.86283	9.41075e-11	3.98198e-09
ESC1_0602770	-2.58848	1.84576e-05	0.000293732
ESC1_0603070	-2.14448	0.00431552	0.0350781
ESC1_0603220	-2.12062	0.00209477	0.0187804
ESC1_0603440	-2.07871	5.33376e-05	0.000772755
ESC1_0603490	-2.42311	3.26361e-15	2.59228e-13
ESC1_0603630	-4.45401	3.88796e-09	1.27096e-07
ESC1_0603730	-2.26002	9.77158e-06	0.00016477
ESC1_0604210	-4.0596	3.15708e-22	5.1977e-20
ESC1_0604470	-2.22894	8.32465e-06	0.00014262
ESC1_0604880	-3.82144	1.17529e-09	4.15711e-08
ESC1_0604920	-4.08144	5.71462e-08	1.55484e-06
ESC1_0605090	-4.95517	3.33991e-13	2.14443e-11
ESC1_0605100	-1.96871	0.00596587	0.0458972
ESC1_0605350	-3.21888	4.49313e-14	3.22899e-12
ESC1_0605550	-1.67284	0.00624556	0.0477649
ESC1_0605610	-3.64484	9.94417e-11	4.18811e-09
ESC1_0605680	-2.78571	0.000516845	0.00561155
ESC1_0605690	-2.91222	0.000109478	0.00144719
ESC1_0606110	-3.64546	7.0414e-06	0.000124046
ESC1_0606400	-9.84163	1.20346e-54	1.36216e-51
ESC1_0606930	-2.79782	4.95785e-07	1.10303e-05
ESC1_0607230	-3.64475	6.459e-13	3.87326e-11
ESC1_0607620	-4.89619	9.37676e-07	1.97917e-05
ESC1_0607740	-6.82125	4.24034e-41	2.13313e-38
ESC1_0607820	-3.95533	0.00607535	0.0466475
ESC1_0607860	-3.92776	1.7739e-05	0.000283292
ESC1_0608170	-6.79226	1.40674e-37	5.53826e-35
ESC1_0608460	-2.82046	2.05414e-07	5.0271e-06
ESC1_0608690	-4.85586	2.32361e-11	1.07899e-09
ESC1_0608940	-4.42519	6.21786e-05	0.00087973
ESC1_0609270	-2.82788	3.60109e-10	1.37586e-08
ESC1_0609490	-3.12795	0.00208476	0.0187091
ESC1_0609650	-2.18375	0.00127954	0.0123824
ESC1_0609680	-2.46119	1.72658e-09	5.94455e-08
ESC1_0609920	-6.11564	2.57031e-17	2.3994e-15
ESC1_0610200	-7.5096	9.46381e-19	1.00817e-16
ESC1_0610540	-5.49043	2.8304e-15	2.26808e-13
ESC1_0610620	-2.0758	0.000323728	0.00375815
ESC1_0610650	-2.79197	1.40433e-05	0.000229534
ESC1_0610710	-1.64236	0.00238382	0.0209771
ESC1_0611610	-2.06375	0.00351264	0.0293422
ESC1_0611680	-2.91802	0.000246158	0.00297195
ESC1_0611970	-3.04589	0.00101661	0.010251
ESC1_0612130	-2.11691	1.32405e-13	9.22254e-12
ESC1_0612370	-3.01863	0.000415666	0.00468142
ESC1_0612990	-2.77386	1.03938e-06	2.16858e-05
ESC1_0613090	-3.93148	0.00523474	0.0411106
ESC1_0613330	-3.5095	1.02177e-05	0.000171654
ESC1_0613350	-3.50151	7.78773e-07	1.67104e-05
ESC1_0700120	-4.66956	0.000753654	0.00785309
ESC1_0700260	-3.06695	0.00127794	0.0123824
ESC1_0700380	-2.24289	0.00291675	0.0248693
ESC1_0700770	-2.48394	1.0955e-06	2.27517e-05
ESC1_0700790	-4.05751	7.54796e-11	3.27018e-09
ESC1_0700840	-2.96437	1.13561e-12	6.50819e-11
ESC1_0700930	-3.20178	3.74214e-05	0.000560084
ESC1_0700940	-3.10191	9.36081e-10	3.35028e-08
ESC1_0700990	-1.87495	0.00519996	0.0409084
ESC1_0701000	-3.38675	3.02455e-13	1.99204e-11
ESC1_0701040	-2.70286	9.60907e-08	2.51474e-06
ESC1_0701350	-2.45804	0.00114963	0.0113645
ESC1_0701570	-2.35697	0.00532374	0.041665
ESC1_0702410	-1.91624	0.000215035	0.00262772
ESC1_0702590	-2.21517	0.00290454	0.0248119
ESC1_0702870	-3.41973	0.000768474	0.0079617
ESC1_0702930	-3.93028	7.82696e-12	4.00413e-10
ESC1_0703050	-3.59983	1.53209e-07	3.84295e-06
ESC1_0703250	-2.5509	4.65461e-05	0.000680896
ESC1_0703280	-3.16442	1.23691e-09	4.35807e-08
ESC1_0703330	-4.71348	0.000150064	0.00193016
ESC1_0703990	-1.71133	0.00497058	0.0394121
ESC1_0704240	-3.10116	3.47754e-06	6.6293e-05
ESC1_0704570	-5.44912	1.18347e-17	1.14003e-15
ESC1_0704640	-3.91915	2.55367e-05	0.000397995
ESC1_0704900	-5.42094	3.61488e-07	8.26585e-06
ESC1_0705150	-4.62274	0.000188629	0.00234298
ESC1_0705770	-2.14028	1.88617e-05	0.000299112
ESC1_0705860	-4.83533	3.3083e-07	7.71544e-06
ESC1_0706040	-7.15077	2.65542e-43	1.71748e-40
ESC1_0706390	-3.1161	3.28922e-21	5.13515e-19
ESC1_0706470	-5.04167	3.56958e-08	1.00381e-06
ESC1_0706670	-3.40245	1.49588e-08	4.47036e-07
ESC1_0706700	-2.39495	3.73009e-05	0.000560084
ESC1_0706760	-2.4128	0.0023604	0.0207913
ESC1_0706820	-2.81216	0.00301955	0.0256596
ESC1_0707140	-4.67445	1.76877e-10	7.1501e-09
ESC1_0707240	-6.24293	1.11259e-39	5.03724e-37
ESC1_0707260	-1.54953	0.0036816	0.0305283
ESC1_0707690	-1.84044	9.48587e-05	0.0012744
ESC1_0707880	-2.66205	1.06491e-11	5.26929e-10
ESC1_0707900	-2.87781	2.32968e-08	6.73969e-07
ESC1_0708410	-2.09253	0.000646352	0.0068533
ESC1_0708460	-2.90036	6.52902e-13	3.88949e-11
ESC1_0708550	-3.22634	8.67645e-09	2.70915e-07
ESC1_0708570	-2.13424	0.000372932	0.00426915
ESC1_0708590	-2.39841	0.00414479	0.0339034
ESC1_0708810	-2.78742	1.76562e-05	0.000282468
ESC1_0708950	-2.09915	0.00419108	0.0342511
ESC1_0708990	-1.81593	0.000352768	0.00406402
ESC1_0709040	-1.82204	0.0034558	0.0289475
ESC1_0709200	-3.06409	7.84894e-13	4.5853e-11
ESC1_0709370	-5.81488	4.07146e-12	2.22091e-10
ESC1_0710700	-2.08014	0.000363077	0.00416688
ESC1_0710790	-1.79738	0.00155012	0.0145454
ESC1_0710850	-2.14302	0.00513264	0.0404844
ESC1_0711700	-3.4831	6.29004e-06	0.000113009
ESC1_0711840	-2.83669	4.81909e-25	1.03897e-22
ESC1_0711970	-4.62766	4.92891e-61	8.92626e-58
ESC1_0712190	-3.08235	2.16035e-14	1.60344e-12
ESC1_0712550	-2.84034	2.82451e-10	1.09768e-08
ESC1_0712590	-4.91066	1.41402e-07	3.57651e-06
ESC1_0712660	-2.71335	8.06036e-07	1.72545e-05
ESC1_0712910	-3.15866	3.35451e-28	8.67859e-26
ESC1_0713220	-1.8702	0.0003703	0.00424439
ESC1_0714090	-1.94798	0.00449939	0.0363767
ESC1_0714110	-3.16277	0.0014957	0.0141226
ESC1_0714210	-3.32335	8.2069e-08	2.17291e-06
ESC1_0714360	-2.80354	7.17012e-13	4.21594e-11
ESC1_0714500	-8.36991	5.04146e-37	1.82602e-34
ESC1_0714590	-5.50291	2.00347e-06	3.95238e-05
ESC1_0800120	-3.44916	5.87865e-08	1.59375e-06
ESC1_0800380	-1.73013	0.00164469	0.0152902
ESC1_0801160	-6.33159	2.45738e-60	3.70859e-57
ESC1_0801490	-4.6187	1.91196e-20	2.74806e-18
ESC1_0801970	-2.14001	6.453e-05	0.000905921
ESC1_0802560	-3.73733	6.72364e-05	0.000938008
ESC1_0802730	-2.18952	0.00138723	0.0132925
ESC1_0802780	-3.02945	2.90621e-05	0.000448309
ESC1_0802800	-8.96545	2.30938e-06	4.52629e-05
ESC1_0803230	-2.98595	0.00191187	0.0174165
ESC1_0803460	-3.27684	7.84566e-05	0.00107803
ESC1_0803550	-1.98485	0.00157823	0.0147535
ESC1_0803560	-3.12874	3.36289e-13	2.14443e-11
ESC1_0803700	-1.72962	0.00627983	0.0479459
ESC1_0803840	-2.0504	0.000579398	0.00621617
ESC1_0803950	-2.21583	0.00053284	0.00577138
ESC1_0804150	-4.78891	3.31824e-29	9.38957e-27
ESC1_0804180	-6.9061	7.02011e-23	1.27134e-20
ESC1_0804230	-3.3524	7.45299e-06	0.000130032
ESC1_0804350	-6.34004	5.16957e-05	0.000751371
ESC1_0804880	-1.89899	1.73695e-06	3.49142e-05
ESC1_0806120	-2.2996	3.04357e-05	0.000467904
ESC1_0806270	-2.31562	6.07951e-09	1.93158e-07
ESC1_0806290	-2.70724	0.000903709	0.00921518
ESC1_0806320	-2.80996	5.76901e-05	0.000825251
ESC1_0807150	-2.4699	0.000375258	0.00428494
ESC1_0807340	-2.08472	0.000279803	0.0033206
ESC1_0807390	-2.18411	0.000347144	0.00400942
ESC1_0808620	-1.79999	0.0030318	0.025705
ESC1_0808630	-2.16408	0.000177538	0.00223143
ESC1_0808950	-2.18357	0.00409627	0.0335368
ESC1_0809500	-2.47239	0.000502383	0.00547519
ESC1_0809930	-2.83644	0.000169098	0.00213852
ESC1_0809960	-2.2202	0.000510212	0.00555285
ESC1_0810330	-2.7943	0.00562214	0.0437358
